# Supplementary material for: Multistate Markov model application for blood pressure transition among the Chinese elderly population: a quantitative longitudinal study
Source: PubMed Central journal article supplement — BMJ Open. 2022 Jul 13;12(7):e059805. doi: 10.1136/bmjopen-2021-059805 (PMC9289040; doi:10.1136/bmjopen-2021-059805), 2022-07-13
Supplement: bmjopen-2021-059805.draft_revisions.pdf [file bmjopen-2021-059805.draft_revisions.pdf]

# BMJ Open

BMJ Open is committed to open peer review. As part of this commitment we make the peer review history of every article we publish publicly available.

When an article is published we post the peer reviewers' comments and the authors' responses online. We also post the versions of the paper that were used during peer review. These are the versions that the peer review comments apply to.

The versions of the paper that follow are the versions that were submitted during the peer review process. They are not the versions of record or the final published versions. They should not be cited or distributed as the published version of this manuscript.

BMJ Open is an open access journal and the full, final, typeset and author-corrected version of record of the manuscript is available on our site with no access controls, subscription charges or pay-per-view fees (<http://bmjopen.bmj.com>).

If you have any questions on BMJ Open's open peer review process please email [info.bmjopen@bmj.com](mailto:info.bmjopen@bmj.com)

# BMJ Open

## Multi-state Markov model application for blood pressure transition among Chinese elderly population

|                               |                                                                                                                                                                                                                                                                                                                                                                                                                                                                                                                                                  |
|-------------------------------|--------------------------------------------------------------------------------------------------------------------------------------------------------------------------------------------------------------------------------------------------------------------------------------------------------------------------------------------------------------------------------------------------------------------------------------------------------------------------------------------------------------------------------------------------|
| Journal:                      | <i>BMJ Open</i>                                                                                                                                                                                                                                                                                                                                                                                                                                                                                                                                  |
| Manuscript ID                 | bmjopen-2021-059805                                                                                                                                                                                                                                                                                                                                                                                                                                                                                                                              |
| Article Type:                 | Original research                                                                                                                                                                                                                                                                                                                                                                                                                                                                                                                                |
| Date Submitted by the Author: | 28-Dec-2021                                                                                                                                                                                                                                                                                                                                                                                                                                                                                                                                      |
| Complete List of Authors:     | Zheng, Xujuan; Shenzhen University, Health Science Center<br>Xiong, Juan; Shenzhen University, School of Public Health<br>Zhang, Yiqin ; Xiamen Medical College Affiliated Second Hospital, Nephrology<br>Xu, Liping; Xiamen Medical College Affiliated Second Hospital, Nephrology<br>Zhou, Lina; Xiamen Medical College Affiliated Second Hospital, Nephrology<br>Zhao, Bin; Affiliated Xiangnan Hospital of Xiaman University, Department of medical laboratory<br>Wang, Yuxin; Xiamen Medical College Affiliated Second Hospital, Nephrology |
| Keywords:                     | Hypertension < CARDIOLOGY, EPIDEMIOLOGY, PUBLIC HEALTH                                                                                                                                                                                                                                                                                                                                                                                                                                                                                           |
|                               |                                                                                                                                                                                                                                                                                                                                                                                                                                                                                                                                                  |

SCHOLARONE™  
Manuscripts

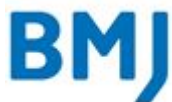

I, the Submitting Author has the right to grant and does grant on behalf of all authors of the Work (as defined in the below author licence), an exclusive licence and/or a non-exclusive licence for contributions from authors who are: i) UK Crown employees; ii) where BMJ has agreed a CC-BY licence shall apply, and/or iii) in accordance with the terms applicable for US Federal Government officers or employees acting as part of their official duties; on a worldwide, perpetual, irrevocable, royalty-free basis to BMJ Publishing Group Ltd ("BMJ") its licensees and where the relevant Journal is co-owned by BMJ to the co-owners of the Journal, to publish the Work in this journal and any other BMJ products and to exploit all rights, as set out in our [licence](#).

The Submitting Author accepts and understands that any supply made under these terms is made by BMJ to the Submitting Author unless you are acting as an employee on behalf of your employer or a postgraduate student of an affiliated institution which is paying any applicable article publishing charge ("APC") for Open Access articles. Where the Submitting Author wishes to make the Work available on an Open Access basis (and intends to pay the relevant APC), the terms of reuse of such Open Access shall be governed by a Creative Commons licence – details of these licences and which [Creative Commons](#) licence will apply to this Work are set out in our licence referred to above.

Other than as permitted in any relevant BMJ Author's Self Archiving Policies, I confirm this Work has not been accepted for publication elsewhere, is not being considered for publication elsewhere and does not duplicate material already published. I confirm all authors consent to publication of this Work and authorise the granting of this licence.

## Title page

### • Short informative title

Multi-state Markov model application for blood pressure transition among Chinese elderly population

### • Short running title

Multi-state Markov model for blood pressure

### • List of all authors

Xujuan **Zheng**<sup>1</sup> \$, Juan **Xiong**<sup>1</sup> \$, Yiqin **Zhang**<sup>2</sup>, Liping **Xu**<sup>2</sup>, Lina **Zhou**<sup>2</sup>, Bin **Zhao**<sup>\*3</sup>, Yuxin **Wang**<sup>\*2</sup>

### Affiliations

<sup>1</sup> Health Science Centre, Shenzhen University, Shenzhen, China

<sup>2</sup> Dept.Nephrology,the No.2 Affiliated Hospital of Xiamen Medical College, Xiamen, China

<sup>3</sup> Department of medical laboratory, Xiang'an Hospital Affiliated to Xiamen University, Xiamen, China

### Corresponding author:

\* Bin Zhao, Department of medical laboratory, Xiang'an Hospital Affiliated to Xiamen University, Xiang'an District, Xiamen, China, 361000.

email: [393603468@qq.com](mailto:393603468@qq.com)

\* Yuxin Wang, Dept.Nephrology,the No.2 Affiliated Hospital of Xiamen Medical College, Xiamen, China, 361000.

email: [wyx\\_1000@126.com](mailto:wyx_1000@126.com)

### Other author footnotes

\$Xujuan Zheng and \$Juan Xiong made equal contributions to this manuscript

### Additional emails

Xujuan Zheng email: [zhengxujuan@szu.edu.cn](mailto:zhengxujuan@szu.edu.cn)

Juan Xiong email: [jxiong@szu.edu.cn](mailto:jxiong@szu.edu.cn)

Yiqin Zhang email: [553098786@qq.com](mailto:553098786@qq.com)

Liping Xu email: [469722875@qq.com](mailto:469722875@qq.com)

Lina Zhou email: [zhoulina154@126.com](mailto:zhoulina154@126.com)

### • Acknowledgments

We would like to thank all participants who voluntarily participated in this study.

### • Funding Statement

YXW was supported by grants from Fujian Province planning project of science and technology (2019D015). JX was supported by the Medical Science and Technology Research Fund Project of Guangdong Province (grant no. A2020405).

**Title page****• Short informative title**

Multi-state Markov model application for blood pressure transition among Chinese elderly population

**• Short running title**

Multi-state Markov model for blood pressure

**• List of all authors**

Xujuan **Zheng**<sup>1</sup> \$, Juan **Xiong**<sup>1</sup> \$, Yiqin **Zhang**<sup>2</sup>, Liping **Xu**<sup>2</sup>, Lina **Zhou**<sup>2</sup>, Bin **Zhao**<sup>\*3</sup>, Yuxin **Wang**<sup>\*2</sup>

**Affiliations**

<sup>1</sup> Health Science Centre, Shenzhen University, Shenzhen, China

<sup>2</sup> Dept.Nephrology,the No.2 Affiliated Hospital of Xiamen Medical College, Xiamen, China

<sup>3</sup> Department of medical laboratory, Xiang'an Hospital Affiliated to Xiamen University, Xiamen, China

**Corresponding author:**

\* Bin Zhao, Department of medical laboratory, Xiang'an Hospital Affiliated to Xiamen University, Xiang'an District, Xiamen, China, 361000.

email: [393603468@qq.com](mailto:393603468@qq.com)

\* Yuxin Wang, Dept.Nephrology,the No.2 Affiliated Hospital of Xiamen Medical College, Xiamen, China, 361000.

email: [wyx\\_1000@126.com](mailto:wyx_1000@126.com)

**Other author footnotes**

\$Xujuan Zheng and \$Juan Xiong made equal contributions to this manuscript

**Additional emails**

Xujuan Zheng email: [zhengxujuan@szu.edu.cn](mailto:zhengxujuan@szu.edu.cn)

Juan Xiong email: [jxiong@szu.edu.cn](mailto:jxiong@szu.edu.cn)

Yiqin Zhang email: [553098786@qq.com](mailto:553098786@qq.com)

Liping Xu email: [469722875@qq.com](mailto:469722875@qq.com)

Lina Zhou email: [zhoulina154@126.com](mailto:zhoulina154@126.com)

## Multi-state Markov model application for blood pressure transition among Chinese elderly population: A longitudinal study

### Abstract

**Background:** The natural process of hypertension is a dynamic evolution, and hypertensive individuals could experience different stages along its progression trajectory with the passage of time. It is imperative to investigate the transition patterns among different levels of blood pressure for early detection and prevention.

**Objective:** To explore the transitions of different blood pressure states based on multi-state Markov model among Chinese elderly population.

**Methods:** The multi-state Markov model was built based on 5001 blood pressure measurements in 1833 old people from 2015 to 2020. The research was conducted to explore hypertension progression process, providing information on the transition probability, hazard ratio, and the mean sojourn time in the three blood pressure states, namely normal state, elevated state, and hypertensive state.

**Results:** Probabilities from normal state to hypertensive state in first year were 16.97% (female) and 21.73% (male); and dramatically increased to 47.31% (female) and 51.70% (male) within 3-year follow-up. The sojourn time of normal state was  $1.5 \pm 0.08$  years. Old women in normal state have 16.97%, 33.30%, and 47.31% chance of progress to hypertension within 1, 2, 3 years, respectively. The corresponding probabilities of old men were 21.73%, 38.56%, and 51.70%, respectively. For old women starting in elevated state, the probabilities of developing hypertension were 25.07%, 43.03%, and 56.32% in next one, two, and three years, respectively; while the corresponding changes of old men were 20.96%, 37.65%, and 50.86%. The increasing age, BMI, and glucose were associated with the probabilities for developing into hypertension from normal state or elevated state (HR: 1.04-1.12).

**Conclusions:** The preventive actions on hypertension progressions should be conducted at the early stages, and at least one yearly checkup is strongly recommended for elderly population. More awareness should be paid for elderly women with elevated state or elderly men with normal state. The increasing age, BMI, and glucose were critical risk factors for developing hypertensions.

**Keywords:** Blood pressure; Hypertension; Probability; Health Services for the Aged; Chinese; Multi-state Markov model

## Introduction

Hypertension, defined by Chinese and European guidelines as an office systolic blood pressure (SBP) of  $\geq 140$  mmHg and/or diastolic blood pressure (DBP) of  $\geq 90$  mmHg without any antihypertensive medication [1-2]. As a significantly increasing global health issue, hypertension is the leading cause of cardiovascular and cerebrovascular diseases, chronic kidney disease and cognitive dysfunction [4-8]. It is likewise regarded as the most frequent modifiable risk factor for cardiovascular-related mortality, morbidity, disability and health expense in the global population [9-14]. During the last decade, the prevalence of hypertension has rapidly increased [15-16]. At present, approximately 1.13 billion people worldwide live with hypertension, and the number is predicted to increase by 15-20% in 2025 [17]. In China, hypertension emerging as a major public health problem influences more than 270 million of population [18-19]; and its incidence increases with age, affecting more than sixty percentages of people older than 60 years [20].

Sound evidence has identified various risk factors of hypertension, ranging from the genetic, environmental, and social-demographic perspectives, such as family history, diet, stress, obesity, age, gender, and hypercholesterolemia [21-24]. However, the commonly used methods of logistic regression and Cox proportional models for these risk factors discovery in the previous research could not offer adequate information about the dynamic process of blood pressure evolution [24-27]. Actually, the natural process of hypertension is a dynamic evolution, and hypertensive individuals could experience different stages along its progression trajectory with the passage of time [28]. According to the hypertension prevention guidelines in China, blood pressure can be divided into three categories: normal state, elevated state, and hypertensive state [1, 29]. Elevated state is the blood pressure range of prehypertension, with the value of 120–139mmHg for SBP and 80–89mmHg for DBP without antihypertensive medication; and means the transition from normal state to hypertension in clinical diagnosis [1]. In addition to hypertensive state, the elevated state is also related to a higher risk of fatal cardiovascular disease. Therefore, it is imperative to investigate the transition patterns among different levels of blood pressure for early detection and prevention [30].

It is noted that multi-state Markov modeling is a modeling technique that have been widely used in healthcare filed to analyze the progression of various chronic diseases, such as hepatitis [31], diabetes [32], chronic kidney disease [33], and

1  
2  
3 Alzheimer's disease [34]. It likewise can be used to analyze the transition from a  
4 normal (non-disease) state, through a mild state to a severe and/or death state  
5 [35]. As an effective method dealing with repeated measurement data, multi-state  
6 Markov model can provide information on inter-state transitions, transition  
7 probability, hazard ratio and the mean sojourn time of the transition in cohort  
8 population [28-29]. There have been two studies exploring the blood pressure states  
9 transition based on multi-state Markov model. One study focused on the US working  
10 population aged 18-54 years old [28]; and the other study focused on the Chinese  
11 population with mean age of 37.54±13.80 years. Compared with young working  
12 population, elderly people have a higher incidence of hypertension, being worthy  
13 more attention and investigation [29].  
14  
15  
16  
17  
18  
19  
20

21 Therefore, our research contributed to explore the state transition dynamics of three  
22 blood pressure states via multi-state Markov model and investigate the risk factors  
23 could associate with the progression of hypertension among the Chinese elderly  
24 population, which has not explored in the existing literature. Furthermore, our study  
25 estimated the information for the special group of old person on the sojourn time in  
26 each blood pressure state and the transition probabilities from one state to other  
27 states that initially providing statistical foundations for early hypertension  
28 prevention, timely targeted interventions, and effectively geriatric nursing.  
29  
30  
31  
32  
33

## 34 **Methods**

### 35 **Aim and Design**

36 A quantitative longitudinal study was conducted to explore the transitions of different  
37 blood pressure states based on multi-state Markov model among Chinese elderly  
38 population.  
39  
40  
41  
42  
43

### 44 **Participants**

45 This research included individuals who volunteered to have a community-organized  
46 freely annual physical examination in a community health center of hospital funded  
47 by Chinese Government from 2015 to 2020. Inclusion criteria were participants aged  
48 60 years or above, and participants attended at least two checkups, including at  
49 least one baseline data and one follow-up data. Exclusion criteria were individuals  
50 who had hypertension at baseline, or whose record with missing data on age,  
51 gender, blood pressure, BMI, or blood glucose. After preprocessing, a total of 1833  
52  
53  
54  
55  
56  
57  
58  
59  
60



1  
2  
3 individuals were included in the study. The maximum follow-up time was 5.7 years,  
4 and the mean follow-up was approximately 2.5 years.  
5  
6

### 7 **Data Collection**

8 This study used data from the annual physical examination. During each checkup per  
9 year, the individual's height, weight, abdominal circumference, blood pressure, and  
10 electrocardiogram were measured, and a blood test was taken to identify their blood  
11 glucose. The socio-demographic data such as age, gender, and marriage status were  
12 collected by health professionals. This study was approved by the review committee  
13 of X hospital, Southeast of China. All participants provided their informed consent  
14 before data collection; and were informed of the purpose and process of the study  
15 and freedom to withdraw whenever they want.  
16  
17  
18  
19  
20  
21

22 Blood pressure was measured by professional medical staff via Omron electronic  
23 sphygmomanometer with appropriately-sized cuffs, measuring SBP and DBP in the  
24 resting, sitting position on the right and left upper arm, respectively [36-37]. All  
25 participants took at least two mandatory blood pressure measurements, with the  
26 interval of ten minutes [38], and the average of two measurements was used as the  
27 result. If the numerical difference of SBP or DBP readings between the two  
28 mandatory measurements was more than 10 mmHg, a third blood pressure  
29 measurement was conducted to avoid error. In order to improve the accuracy of  
30 measurement, participants were asked to relax for >5 min, avoid caffeine, exercise,  
31 and smoking for at least 30 min before measurement. Neither the participant nor the  
32 observer should talk during the rest period or during the measurement.  
33  
34  
35  
36  
37  
38  
39

40 In the research, three blood pressure states were categorized via the Chinese  
41 Hypertension Prevention Guide 2010 Third Edition [1]: (1) normal state: SBP less  
42 than 120mmHg, DBP less than 80 mmHg, and not taking any antihypertensive  
43 medicine; (2) elevated state: SBP 120–139mmHg (DBP<90mmHg) or DBP 80–  
44 89mmHg (SBP<140 mmHg), and not taking any antihypertensive medicine; (3)  
45 hypertensive state: SBP at least 140mmHg or DBP at least 90mmHg or taking any  
46 antihypertensive medicine.  
47  
48  
49  
50  
51

52 Body mass index (BMI) is the ratio of a person's weight (in kilograms) to the square  
53 of height (in meters). In this study, four BMI categories were defined by Chinese  
54 Center for Disease Control and Prevention (1) underweight: BMI less than 18.5  
55  
56  
57  
58  
59  
60

1  
2  
3 kg/m<sup>2</sup>; (2) normal: BMI ranging from 18.5 to 24.0 kg/m<sup>2</sup>; (3) overweight: BMI  
4 ranging from 24.0 kg/m<sup>2</sup> to 28.0 kg/m<sup>2</sup>; (4) obese: BMI higher than 28.0 kg/m<sup>2</sup>.  
5  
6

### 7 **Statistical Analysis**

8 Descriptive analysis was used to describe the social-demographic and clinical data.  
9 For continuous data, mean and standard deviation (SD) was used; and for  
10 categorical data, frequencies and percentages were used. Hazard ratios (HRs) and  
11 corresponding 95% confidence intervals (CIs) were used in the statistical analysis.  
12 The multi-state Markov model was built using msm package of R software [39].  $\chi^2$   
13 was reported to compare differences in baseline characteristics between the male  
14 and female person. All the statistical analyses were conducted by R software (R  
15 Foundation, Vienna, Austria). A *P* value less than 0.05 was considered statistically  
16 significant.  
17  
18  
19  
20  
21  
22

23 In the Markov model of this study, there are three blood pressure states of interest:  
24 state 1 (normal state), state 2 (elevated state), and state 3 (hypertensive state). A  
25 state change is regarded as a transition. If the state can continue to transition to  
26 another, it is classified as a transient state; otherwise, it is an absorbing state  
27 meaning a lifelong health condition [39]. In the research, both normal state and  
28 elevated state were transient states as the model assumed that both the two states  
29 could transit to each other as well as to the hypertensive state. By contrast, once an  
30 individual transited to the hypertension state, he or she could not re-transit to  
31 normal state or elevated state because the transitions from hypertension to other  
32 states were not a natural process [28].  
33  
34  
35  
36  
37  
38  
39

40 Six possible transitions among the three states were illustrated in Figure 1. For  
41 example, the blood pressure of an individual can stay in the current state or transit  
42 to any of the other states, such as normal → normal, normal → elevated, normal →  
43 hypertensive, elevated → elevated, elevated → normal, elevated → hypertensive.  
44 The sojourn time means the average length of time staying in a transient state  
45 before transiting to a new state.  
46  
47  
48  
49

## 50 **Results**

### 51 **Baseline Characteristics of Participants**

52 In this study, 1833 subjects were included with the 5001 measurement records. At  
53 the baseline checkup, 443 (25.17%) participants were in normal state and 1390  
54  
55  
56  
57  
58  
59  
60

(75.83%) participants were in elevated state. However, at the final checkup, 247 (13.48%) individuals were in normal state, 447 (24.39%) individuals were in elevated state and 1139 (62.14%) individuals were in hypertensive state (Table 1).

**Table 1** The statistic of blood pressure state transition

| Blood pressure state | Baseline checkup N(%) | Final checkup N(%) |
|----------------------|-----------------------|--------------------|
| Normal state         | 443 (24.17)           | 247 (13.48)        |
| Elevated state       | 1390 (75.83)          | 447 (24.39)        |
| Hypertensive state   | 0 (0.00)              | 1139 (62.14)       |
| Total                | 1833 (100.00)         | 1833 (100.00)      |

Among these participants, the mean age was 65.5 (6.04) years, and 967 (52.76%) were female. The baseline characteristics of these participants, and their discrepancy between male and female participants were summarized in Table 2.

**Table 2** Baseline characteristics of participants

| Variable              | Overall, N = 1,833 <sup>1</sup> | Male, N = 866 | Female, N = 967 | P-value <sup>2</sup> |
|-----------------------|---------------------------------|---------------|-----------------|----------------------|
| Age Mean (SD)         | 65.5 (6.04)                     | 65.7 (5.85)   | 65.4 (6.20)     | 0.031                |
| Married               | 1,605(88%)                      | 817(94%)      | 788 (82%)       | <0.001               |
| <b>Blood pressure</b> |                                 |               |                 | 0.002                |
| Normal state          | 443(24%)                        | 181 (21%)     | 262 (27%)       |                      |
| Elevated state        | 1,390 (76%)                     | 685 (79%)     | 705 (73%)       |                      |
| Glucose Mean (SD)     | 5.6 (1.67)                      | 5.5 (1.38)    | 5.8 (1.88)      | <0.001               |
| Diabetes              | 119 (6.5%)                      | 51 (5.9%)     | 68 (7.0%)       | 0.300                |
| <b>BMI</b>            |                                 |               |                 | <0.001               |
| Normal                | 1,160 (63%)                     | 579 (67%)     | 581 (60%)       |                      |
| Obese                 | 78(4.3%)                        | 28 (3.2%)     | 50 (5.2%)       |                      |
| Overweight            | 421 (23%)                       | 170 (20%)     | 251 (26%)       |                      |
| Underweight           | 174 (9.5%)                      | 89 (10%)      | 85 (8.8%)       |                      |
| Abnormal ECG          | 466 (28%)                       | 248 (32%)     | 218 (25%)       | 0.001                |

### Transition Frequency from One Checkup to the Following Checkup

Among 5001 blood pressure measurements in 1833 old people over the period of 2015-2020, 1833 measurements were conducted at the baseline checkup and 3168

measurements were conducted at follow-up checkups. The numbers of transitions from one checkup (given by the row state) to the next one (given by the column state) were shown in Table 3.

**Table 3** Observed number of transitions from one checkup to the next checkup

| From\To  | Normal      | Elevated     | Hypertensive | Total      |
|----------|-------------|--------------|--------------|------------|
| Normal   | 430(47.25%) | 242(26.59%)  | 238(26.15%)  | 910(100%)  |
| Elevated | 284(12.58%) | 1073(47.52%) | 901(39.90%)  | 2258(100%) |

Of the 3168 transitions, 26.59% showed deterioration from normal state to elevated state at the next checkup; 26.15% from normal state to hypertensive state, and 47.25% with normal state showed no change. Similarly, there were 1073 occurrences where participants remained in elevated state, 901 (39.90%) cases where participants progressed from elevated state to hypertension, while 284 (12.25%) cases showed alleviation from elevated state to normal state at the following visit.

The six possible blood pressure state transitions with the corresponding probabilities over one year, two years and three years period, stratified by gender were illustrated in Figure 2 and 3. Compared with male participants, female participants have lower probabilities from normal state to hypertensive state; but have higher probabilities from elevated state to hypertensive state over any periods of time. For instance, old women in normal state have 16.97%, 33.30%, and 47.31% chance of progress to hypertension if the next checkup was performed after the interval of one year, two years and three years, respectively. By contrast, the chances of old men moving from normal state to hypertensive state were 21.73%, 38.56%, and 51.70% within 1, 2, 3 years, respectively. For old women starting in elevated state, the probabilities of developing hypertension were 25.07%, 43.03%, and 56.32% in the next one, two, and three years, respectively; while the corresponding changes of old men between the two states transition were 20.96%, 37.65%, and 50.86%. As time went by, both female and male participants had a higher probability of developing hypertension. For example, the changes from normal state to hypertensive state over a 1-year follow-up were 16.97% (female) and 21.73% (male); and dramatically increased to 47.31% (female) and 51.70% (male) within the 3-year follow-up.

The sojourn time of normal state in the study cohort was  $1.5 \pm 0.08$  years, and the duration of elevated state was  $2.0 \pm 0.07$  years.

### Covariate Effects on Blood Pressure States Transitions

The covariates included in the research were age, gender, marriage, BMI, glucose, and ECG. The effects of covariates on blood pressure state transition with statistical significance are summarized in Table 4. Gender, BMI, age and glucose had some significant associations with possible transitions. For example, the increasing age, BMI, and glucose were risk factors for developing into hypertension from the normal state or elevated state (HR: 1.04-1.12). Female participants and participants with higher glucose were less likely to alleviate from elevated state to normal state than male counterparts (HR: 0.61-0.83).

**Table 4** Covariate effects on blood pressure states transitions

| Covariate | Normal-Elevated<br>HR (95% CI) | Normal-Hypertensive<br>HR (95% CI) | Elevated-Normal<br>HR (95% CI) | Elevated -Hypertensive<br>HR (95% CI) |
|-----------|--------------------------------|------------------------------------|--------------------------------|---------------------------------------|
| Gender    | 1.131 (0.807, 1.586)           | 0.544 (0.288, 1.028)               | 0.606 (0.412, 0.891)           | 1.461 (0.999, 2.136)                  |
| BMI       | 1.038 (0.992, 1.086)           | 1.124 (1.058, 1.195)               | 1.017 (0.963, 1.074)           | 1.019 (0.983, 1.057)                  |
| Age       | 1.016 (0.980, 1.054)           | 1.042 (1.010, 1.075)               | 1.018 (0.990, 1.047)           | 1.017 (0.997, 1.037)                  |
| Glucose   | 1.013 (0.947, 1.083)           | 0.876 (0.697, 1.102)               | 0.827 (0.715, 0.956)           | 1.054 (1.012, 1.097)                  |

### Survival Probability Based on Multi-state Markov Model

The multi-state Markov model can be used to infer the survival probability for each subgroup in the future, which may provide insightful information for the individuals. In this study, survival probability represents the probability of not transiting into the hypertensive state. Survival probability curves over 5 years for all subgroups stratified by female and male categories were given in Figure 4 and 5. The survival probability decreased significantly with increased time among all subgroups. As shown in Figure 4, the survival probability for female participants originating from the normal state was similar with the probability for male participants (no difference,  $P=0.70$ ). Figure 5 illustrated that male participants starting from elevated state had a higher survival probability over 5 years than female participants ( $P=0.01$ ).

## Discussion

Hypertension is regarded as the leading cause of cardiovascular and cerebrovascular diseases; and the most frequent risk factor for cardiovascular-related mortality, morbidity, disability and health expense in the global population [9-14]. In addition to hypertensive state, the elevated state is also identified as a higher risk of fatal cardiovascular disease. Thus, it is of significance to investigate the transition patterns among different levels of blood pressure, and the factors influencing the progression and regression of blood pressure for early detection and prevention [30]. Sound evidence verified compared with young population, elderly people have a higher incidence of hypertension, being worthy more attention and investigation [29]. With the huge total population in China, there were 254 million people aged  $\geq 60$  years accounting for 18.1% of the whole population in 2020 [40]. Therefore, in this study, we explore the state transition dynamics of three blood pressure states via multi-state Markov model and investigate the risk factors could associate with the progression of hypertension for elderly population in China, which has not explored in the existing literature.

There are some significant findings in the research. Firstly, our research found that of the 3168 transitions, 26.15% of participants showed deterioration from normal state to hypertensive state at the next checkup, much higher than the corresponding percentage of 16.98 and 9.18 in the previous studies for working population [28-29]. It further confirmed that older people should be caused much more attention on hypertension prevention and research. Secondly, we found that both female and male participants in normal state had a lower probability of developing hypertension in the first year; however, the probability substantially increased in the following three year, which was consistent with the prior research for young people [28-29]. In the study, the changes from normal state to hypertensive state in the first year were 16.97% (female) and 21.73% (male); and dramatically increased to 47.31% (female) and 51.70% within the 3-year follow-up. Furthermore, the sojourn time of normal state was  $1.5 \pm 0.08$  years in the study cohort. These results indicated that the preventive actions and effective intervention on hypertension progression should be conducted at the early stages, and at least one yearly checkup is strongly recommended for elderly population. Thirdly, male participants were found to have high probabilities from normal state to hypertension, in comparison with female participants. For example, old women in normal state have 16.97%, 33.30%, and 47.31% chance of progress to hypertension within 1, 2, 3 years, respectively. By

1  
2  
3 contrast, the corresponding chances of old men were 21.73%, 38.56%, and 51.70%  
4 respectively. The findings well align with the prior study that indicated that more  
5 attention should be paid to elderly men with normotension [28, 41, and 42].  
6 However, we initially found that elderly female participants had higher probabilities  
7 developing from elevated state to hypertensive state than male participants. For  
8 instance, for old women starting in elevated state, the probabilities of developing  
9 hypertension were 25.07%, 43.03%, and 56.32% in the next one, two, and three  
10 years, respectively; while the corresponding changes of old men between the two  
11 states transition were 20.96%, 37.65%, and 50.86%. Female participants were less  
12 likely to alleviate from elevated state to normal state than male counterparts in the  
13 study (HR: 0.61, 95% CI: 0.41-0.89). Our survival probability pilot also illustrated  
14 that male participants starting from elevated state had a higher survival probability  
15 over 5 years than female participants ( $P=0.01$ ). The above findings reminded that  
16 more attention should be paid at the progression from elevated state to hypertension  
17 in elderly women.  
18  
19  
20  
21  
22  
23  
24  
25  
26

27 In addition to age and gender discussed above, the increasing BMI (HR: 1.12, 95%  
28 CI: 1.06-1.20) and glucose (HR: 1.05, 95% CI: 1.01-1.10) were identified to be risk  
29 factors for developing into hypertension from normal state or elevated state. The  
30 previous research also found that the hazard ratio for transitioning from normal state  
31 to hypertensive state improved with the higher BMI value [28, 29, and 43]; and the  
32 higher glucose value [44].  
33  
34  
35  
36  
37

38 In summary, there are key contributions in the research. First of all, a multi-state  
39 Markov model was used to explore the state transition dynamics of three blood  
40 pressure states, and investigated how several important covariates affected the  
41 progression or alleviation of hypertension for Chinese elderly population.  
42 Furthermore, through the developed model, the sojourn time in each blood pressure  
43 state and the transition probabilities from one state to other state were estimated,  
44 therefore supplying statistical foundations for the preventive actions and effective  
45 intervention on hypertension progression for elderly people.  
46  
47  
48  
49  
50

### 51 Limitations

52 By contrast, some limitations can be summarized as follows. (1) Owing to the time  
53 and financial limitation, we only focused on the cohort population over five years in  
54 one city; thus the study findings could not representative and fit for extrapolation.  
55  
56  
57  
58  
59  
60

1  
2  
3 (2) In this study, the hypertensive state was regarded as absorbing state, meaning  
4 that the reversed transition from hypertensive state to normal or elevated state  
5 could not be included. (3) Some significant covariates such as varied life habits of  
6 diet, exercise and psychological status were not covered in the current study, being  
7 worthy of investigating in the further research.  
8  
9  
10

### 11 12 13 **Conclusions**

14 The results of three blood pressure state transition probabilities caused more  
15 awareness about the timely prevention for elderly women with elevated state and  
16 elderly men with normal state. The preventive actions and effective intervention on  
17 hypertension progression should be conducted at the early stages, and at least one  
18 yearly checkup is strongly recommended for elderly people. The increasing age, BMI,  
19 and glucose were risk factors for developing into hypertension from the normal state  
20 or elevated state. The derived transition probabilities and sojourn time can serve as  
21 a significant reference for health professionals to make proactive plans and targeted  
22 interventions for hypertension progression among Chinese elderly population.  
23  
24  
25  
26  
27  
28

29 **Figure 1:** Three blood pressure states transitions In the Markov model

30 **Figure 2:** Female participants' transition diagrams

31 **Figure 3** Male participants' transition diagrams

32 **Figure 4** The survival distribution starting from normal state

33 **Figure 5** The survival distribution starting from elevated state  
34  
35  
36  
37  
38

### 39 **Acknowledgements**

40 We would like to thank all participants who voluntarily participated in this study.  
41  
42  
43

### 44 **Contributorship statement**

45 XZ and JX performed the statistical analysis, interpretation and wrote the  
46 manuscript. YZ, LX and LZ contributed to the conceptualization of the research  
47 process and critically reviewed the manuscript. BZ and YW are responsible for the  
48 overall content as guarantor. All authors read and approved the final manuscript.  
49  
50  
51  
52  
53  
54  
55  
56  
57  
58  
59  
60



### Funding

YW was supported by grants from Fujian Province planning project of science and technology (2019D015). JX was supported by the Medical Science and Technology Research Fund Project of Guangdong Province (grant no. A2020405).

### Ethics approval

This study was approved by the review committee of X hospital, Southeast of China. All participants provided their informed consent before data collection; and were informed of the purpose and process of the study and freedom to withdraw whenever they want.

### Conflicts of Interest

None

### References

1. Liu LS. 2010. Chinese guidelines for the management of hypertension. *Zhonghua Xin Xue Guan Bing Magazine* 2011; 39:579–615.
2. Williams B, Mancia G, Spiering W, et al. ESC/ESH Guidelines for the management of arterial hypertension. *Eur Heart J* 2018;39(33):3021–3104. doi:10.1080/08037051.2018.1527177.
3. Herman WW, Konzelman JL, Prisant LM. Joint national committee on prevention, detection, evaluation, and treatment of high blood pressure. The seventh report of the joint national committee on prevention, detection, evaluation, and treatment of high blood pressure bethesda (MD): National heart, lung, and blood institute (US) 2004.
4. Lawes CM, Hoorn SV, Rodgers A. Global burden of blood-pressure-related disease. *Lancet* 2008;371:1513–1518. doi: 10.1016/S0140-6736(08)60655-8.
5. Kokubo Y, Matsumoto C. Hypertension is a risk factor for several types of heart disease: review of prospective studies. *Adv Exp Med Biol* 2017;956:419–26. doi: 10.1007/5584\_2016\_99.
6. Oparil S, Acelajado MC, Bakris GL, et al. Hypertension. *Nat Rev Dis Primers* 2018;4(18014):1–21. doi: 10.1038/nrdp.2018.14.
7. Tackling G, Borhade MB, Tackling G, et al. Hypertensive heart disease. [Updated 2020 Jun 28]. In: StatPearls [Internet]. Treasure Island (FL): StatPearls Publishing 2020. <https://www.ncbi.nlm.nih.gov/books/NBK539800/>

- 1
  - 2
  - 3
  - 4
  - 5
  - 6
  - 7
  - 8
  - 9
  - 10
  - 11
  - 12
  - 13
  - 14
  - 15
  - 16
  - 17
  - 18
  - 19
  - 20
  - 21
  - 22
  - 23
  - 24
  - 25
  - 26
  - 27
  - 28
  - 29
  - 30
  - 31
  - 32
  - 33
  - 34
  - 35
  - 36
  - 37
  - 38
  - 39
  - 40
  - 41
  - 42
  - 43
  - 44
  - 45
  - 46
  - 47
  - 48
  - 49
  - 50
  - 51
  - 52
  - 53
  - 54
  - 55
  - 56
  - 57
  - 58
  - 59
  - 60
8. Jan YT, Tsai PS, Longenecker CT, *et al.* Thoracic aortic calcification and pre-clinical hypertension by new 2017 ACC/AHA hypertension guidelines. *Diagnostics* 2021;11:1027.
9. Ettehad D, Emdin CA, Kiran A, *et al.* Blood pressure lowering for prevention of cardiovascular disease and death: A systematic review and meta-analysis. *Lancet* 2016;387:957–967. doi: 10.1016/S0140-6736(15)01225-8.
10. Khaja SU, Mathias KC, Bode ED, *et al.* Hypertension in the United States fire service. *Int. J. Environ. Res. Public Health* 2021;18:5432. doi:10.3390/ijerph18105432.
11. GBD 2015 neurological disorders collaborator group. Global, regional, and national comparative risk assessment of 79 behavioral, environmental and occupational, and metabolic risks or clusters of risks, 1990–2015: A systematic analysis for the global burden of disease study 2015. *Lancet Neural* 2017;16(388):877–97.
12. Di Palo KE; Barone NJ. Hypertension and heart failure: Prevention, targets, and treatment. *Heart Fail. Clin.* 2020;16:99–106. doi: 10.1016/j.hfc.2019.09.001.
13. Dominguez LJ, Veronese N, Barbagallo M. Magnesium and hypertension in old age. *Nutrients* 2021;13:139. doi: 10.3390/nu13010139.
14. Ye X, Yi Q, Shao J, *et al.* Trends in prevalence of hypertension and hypertension phenotypes among Chinese children and adolescents over two decades (1991–2015). *Front. Cardiovasc. Med* 2021;8:627741. doi: 10.3389/fcvm.2021.627741.
15. Kearney PM, Whelton M, Reynolds K, *et al.* Global burden of hypertension: analysis of worldwide data. *Lancet* 2005;365(9455):217–223.
16. Forouzanfar MH, Liu BP, Roth GA, *et al.* Global burden of hypertension and systolic blood pressure of at least 110 to 115 mm Hg, 1990–2015. *JAMA* 2017;317(2):165–182. doi: 10.1001/jama.2016.19043.
17. WHO. Hypertension. World Health Organisation. <https://www.who.int/newsroom/factsheets/detail/hypertension>. Published 2019. Accessed 2 October 2020.
18. Griffin G. Antiplatelet therapy and anticoagulation in patients with hypertension. *Am Fam Physician* 2005;71:897–9. doi: 10.1001/jama.293.9.1123.

19. Xiong X, Yang X, Liu Y, *et al.* Chinese herbal formulas for treating hypertension in traditional Chinese medicine: perspective of modern science. *Hypertens Res* 2013;36:570–9. doi: 10.1038/hr.2013.18.
20. Chow CK, Teo KK, Rangarajan S, *et al.* Prevalence, awareness, treatment, and control of hypertension in rural and urban communities in high-, middle-, and low-income countries. *JAMA* 2013;310(9):959–968. doi: 10.1001/jama.2013.184182.
21. Patel RS, Masi S and Taddei S. Understanding the role of genetics in hypertension. *Eur. Heart J* 2017;38(29): 2309–2312. doi: 10.1093/eurheartj/ehx273.
22. Li C, Sun DD, Liu JL, *et al.* A prediction model of essential hypertension based on genetic and environmental risk factors in northern han Chinese. *Int. J. Med. Sci* 2019;16(6):793–799. doi: 10.7150/ijms.33967.
23. Bigazzi R, Zagato L, Lanzani C, *et al.* Hypertension in high school students: Genetic and environmental factors: The HYGEF study. *Hypertension* 2020;75:71–78. doi: 10.1161/HYPERTENSIONAHA.119.13818.
24. Zhang YY, Yang H, Ren M, *et al.* Distribution of risk factors of hypertension patients in different age groups in Tianjin. *BMC Public Health* 2021;21:247. doi: 10.1186/s12889-021-10250-9.
25. Shihab HM, Meoni LA, Chu AY, *et al.* Body mass index and risk of incident hypertension over the life course: The Johns Hopkins precursors study. *Circulation* 2012;126(25):2983–2989. doi: 10.1161/CIRCULATIONAHA.112.117333.
26. Tohidi M, Hatami M, Hadaegh F, *et al.* Triglycerides and triglycerides to high-density lipoprotein cholesterol ratio are strong predictors of incident hypertension in middle eastern women. *J. Hum. Hypertens* 2012;26(9):525–532. doi: 10.1038/jhh.2011.70.
27. Zhang W, Wang L, Chen Y, *et al.* Identification of hypertension predictors and application to hypertension prediction in an urban han Chinese population: A longitudinal study, 2005–2010. *Preventing Chronic Disease* 2015;12:E184. doi: 10.5888/pcd12.150192.
28. Yang JM, Liu F, Wang B, *et al.* Blood pressure states transition inference based on multi-state Markov model. *IEEE J Biomed Health* 2021;25(1):237–246. doi: 10.1109/JBHI.2020.3006217.

- 1  
2  
3 29. Wang YF, Ma ZM, Xu CN, *et al.* Prediction of transfer among multiple states of  
4 blood pressure based on Markov model: an 18-year cohort study. *J.*  
5 *Hypertens* 2018;36:15061513. doi:10.1097/HJH.0000000000001722.  
6  
7  
8 30. Mills KT, Obst KM, Wei S, *et al.* Comparative effectiveness of implementation  
9 strategies for blood pressure control in hypertensive patients: A systematic  
10 review and meta-analysis. *Ann. Internal Med* 2018;168(2):110–120. doi:  
11 10.7326/M17-1805.  
12  
13 31. Tada T, Kumada T, Toyoda H, *et al.* Longterm natural history of liver disease  
14 in patients with chronic hepatitis b virus infection: An analysis using the  
15 Markov chain model. *J. Gastroenterol* 2018;53(11):1196–1205. doi:  
16 10.1007/s00535-018-1467-x.  
17  
18 32. Wong LY, Toh MPHS and Tham LWC. Projection of prediabetes and diabetes  
19 population size in singapore using a dynamic Markov model. *J. Diabetes*  
20 2017;9(1):65–75. doi: 10.1111/1753-0407.12384. 10.1111/1753-  
21 0407.12384  
22  
23 33. Grover G, Sabharwal A, Kumar S, *et al.* A multi-state Markov model for the  
24 progression of chronic kidney disease. *Türkiye Klinikleri Biyoistatistik*  
25 2019;11(1):1–14. doi: 10.5336/biostatic.2018-62156.  
26  
27 34. Brookmeyer R and Abdalla N. Multistate models and lifetime risk estimation:  
28 Application to Alzheimer’s disease. *Statist. Med* 2019;38(9):1558–1565. doi:  
29 10.1002/sim.8056.  
30  
31 35. Srikanth P. Using Markov chains to predict the natural progression of diabetic  
32 retinopathy. *Int. J. Ophthalmol* 2015;8(1):383 132–137. doi:  
33 CNKI:SUN:GYZZ.0.2015-01-026.  
34  
35 36. Attard SM, Herring AH, Zhang B, *et al.* Associations between age, cohort, and  
36 urbanization with SBP and DBP in China: a population based study across 18  
37 years. *J Hypertens* 2015;33:948–956.  
38  
39 37. Guo J, Zhu YC, Chen YP, *et al.* The dynamics of hypertension prevalence,  
40 awareness, treatment, control and associated factors in Chinese adults:  
41 results from CHNS 1991-2011. *J Hypertens* 2015;33:1688–1696.  
42  
43 38. Cuddy MLS. The Seventh report of the joint national committee on  
44 prevention, detection, evaluation, and treatment of high blood pressure.  
45 *Hypertension* 2004;55:17–21.  
46  
47 39. Jackson CH. Multi-state models for panel data: the msm package for R. *J Stat*  
48 *Soft* 2011;38:1–28. doi: 10.18637/jss.v038.i08.  
49  
50  
51  
52  
53  
54  
55  
56  
57  
58  
59  
60

- 1  
2  
3 40. China development research foundation, 2020. China development report-  
4 aging population in 2020: Development trend and policy options. Available  
5 from URL: <http://www.199it.com/archives/1068230.html>  
6  
7  
8 41. Singh S, Shankar R, and Singh GP. Prevalence and associated risk factors of  
9 hypertension: A cross-sectional study in urban Varanasi. *Int. J.Hypertens*  
10 2017;2017:5491838. doi: 10.1155/2017/5491838.  
11  
12 42. Faulkner JL and de Chantemèle EJB. Sex differences in mechanisms of  
13 hypertension associated with obesity. *Hypertension* 2018;71(1):15–21. doi:  
14 10.1161/HYPERTENSIONAHA.117.09980.  
15  
16 43. Davis J, Juarez D, and Hodges K. Relationship of ethnicity and body mass  
17 index with the development of hypertension and hyperlipidemia. *Ethnicity*  
18 *Disease* 2013;23(1):65–70. doi: 10.1111/jphd.12008.  
19  
20 44. Huang Z, Wang GD, Jonas JB, *et al.* Blood pressure control and progression of  
21 arteriosclerosis in hypertension. *J. Hypertens* 2021;39(6):1221-1229. doi:  
22 10.1097/HJH.0000000000002758.  
23  
24  
25  
26  
27  
28  
29  
30  
31  
32  
33  
34  
35  
36  
37  
38  
39  
40  
41  
42  
43  
44  
45  
46  
47  
48  
49  
50  
51  
52  
53  
54  
55  
56  
57  
58  
59  
60

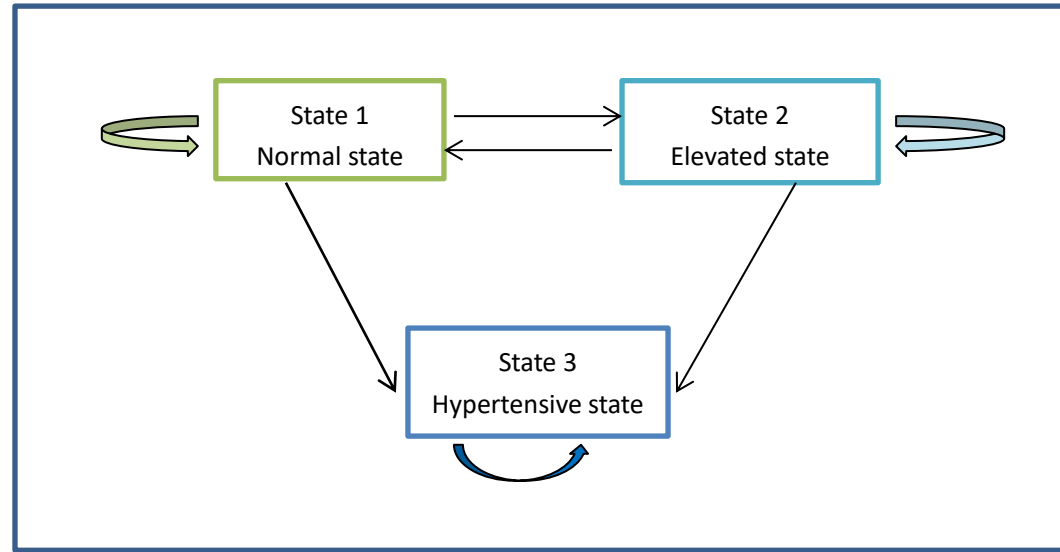

**Figure 1** Three blood pressure states transitions In the Markov model

1  
2  
3  
4  
5  
6  
7  
8  
9  
10  
11  
12  
13  
14  
15  
16  
17  
18  
19  
20  
21  
22  
23  
24  
25  
26  
27  
28  
29  
30  
31  
32  
33  
34  
35  
36  
37  
38  
39  
40  
41  
42  
43  
44  
45  
46

1  
2  
3  
4  
5  
6  
7  
8  
9  
10  
11  
12  
13  
14  
15  
16  
17  
18  
19  
20  
21  
22  
23  
24  
25  
26  
27  
28  
29  
30  
31  
32  
33  
34  
35  
36  
37  
38  
39  
40  
41  
42  
43  
44  
45  
46

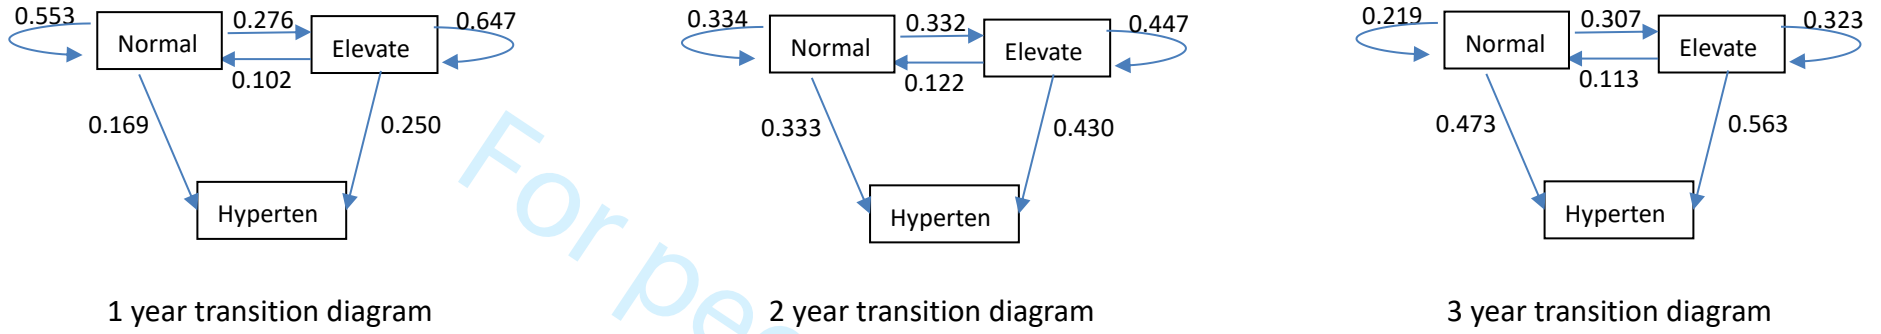

Figure 2 Female participants' transition diagrams

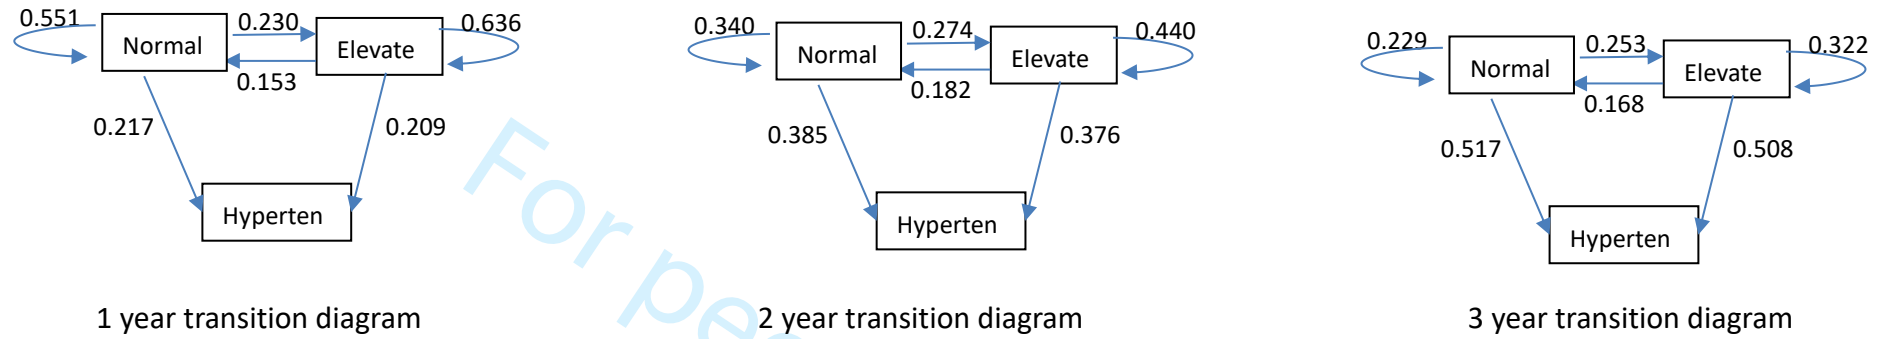

**Figure 3** Male participants' transition diagrams



1  
2  
3  
4  
5  
6  
7  
8  
9  
10  
11  
12  
13  
14  
15  
16  
17  
18  
19  
20  
21  
22  
23  
24  
25  
26  
27  
28  
29  
30  
31  
32  
33  
34  
35  
36  
37  
38  
39  
40  
41  
42  
43  
44  
45  
46  
47  
48  
49  
50  
51  
52  
53  
54  
55  
56  
57  
58  
59  
60

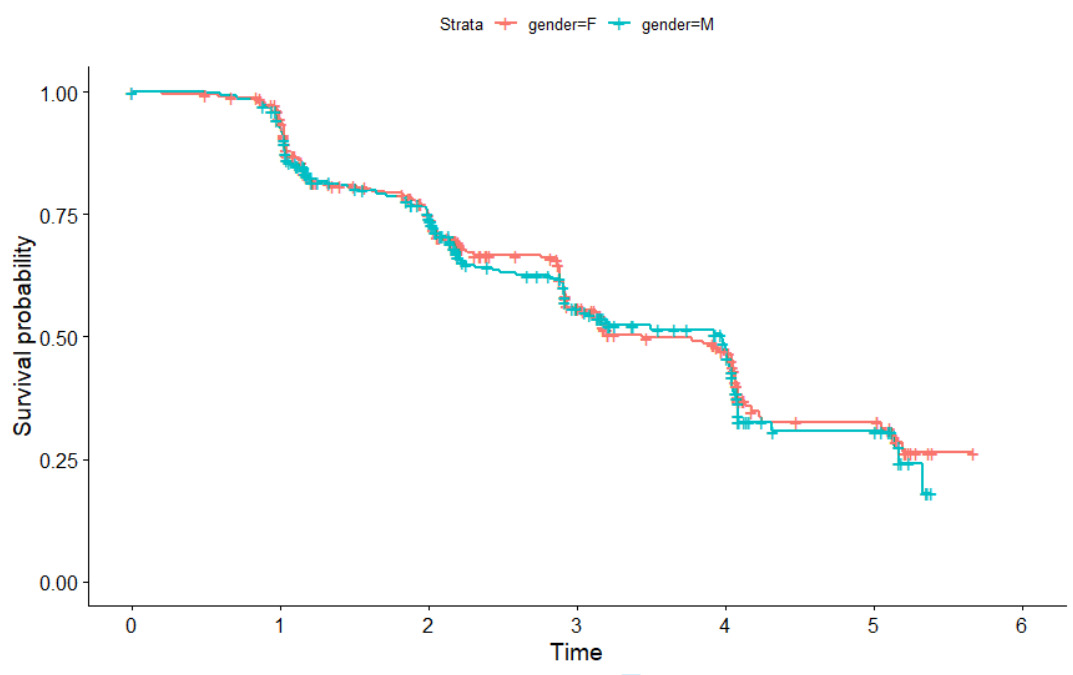

**Figure 4** The survival distribution starting from normal state

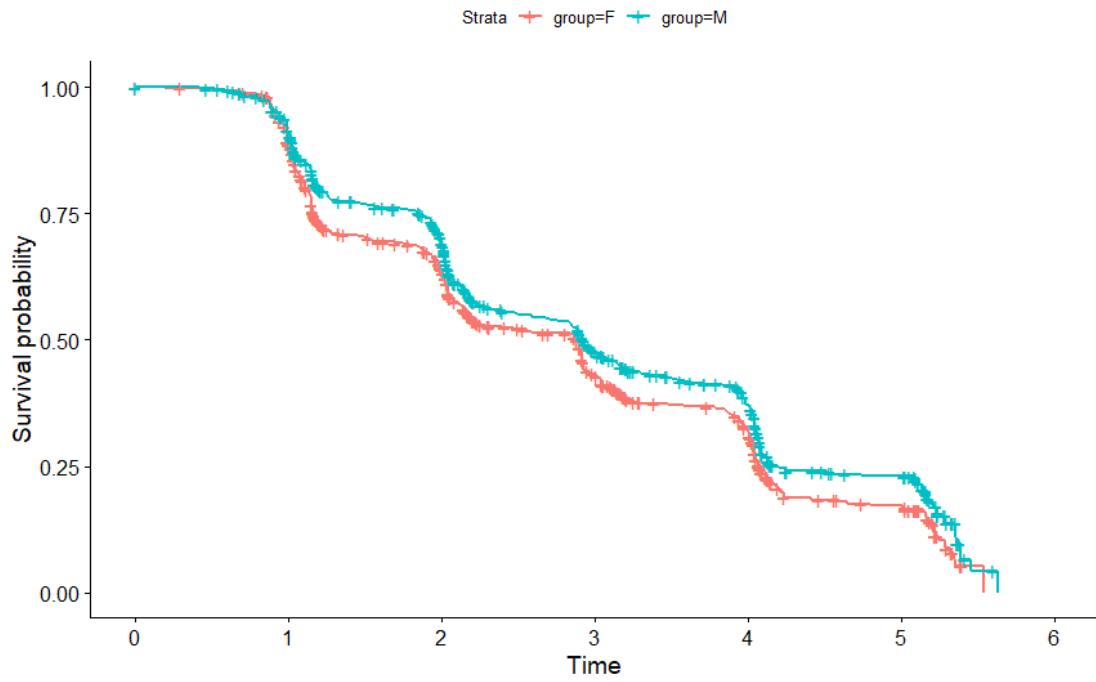

**Figure 5** The survival distribution starting from elevated state

STROBE Statement—Checklist of items that should be included in reports of *cohort studies*

|   | Item No                         | Recommendation                                                                                                                                                                                                                                                                                                                                                                                                |
|---|---------------------------------|---------------------------------------------------------------------------------------------------------------------------------------------------------------------------------------------------------------------------------------------------------------------------------------------------------------------------------------------------------------------------------------------------------------|
| ✓ | <b>Title and abstract</b> 1     | (a) Indicate the study's design with a commonly used term in the title or the abstract<br>(b) Provide in the abstract an informative and balanced summary of what was done and what was found                                                                                                                                                                                                                 |
|   | <b>Introduction</b>             |                                                                                                                                                                                                                                                                                                                                                                                                               |
| ✓ | Background/rationale 2          | Explain the scientific background and rationale for the investigation being reported                                                                                                                                                                                                                                                                                                                          |
| ✓ | Objectives 3                    | State specific objectives, including any prespecified hypotheses                                                                                                                                                                                                                                                                                                                                              |
|   | <b>Methods</b>                  |                                                                                                                                                                                                                                                                                                                                                                                                               |
| ✓ | Study design 4                  | Present key elements of study design early in the paper                                                                                                                                                                                                                                                                                                                                                       |
| ✓ | Setting 5                       | Describe the setting, locations, and relevant dates, including periods of recruitment, exposure, follow-up, and data collection                                                                                                                                                                                                                                                                               |
| ✓ | Participants 6                  | (a) Give the eligibility criteria, and the sources and methods of selection of participants. Describe methods of follow-up<br>(b) For matched studies, give matching criteria and number of exposed and unexposed                                                                                                                                                                                             |
| ✓ | Variables 7                     | Clearly define all outcomes, exposures, predictors, potential confounders, and effect modifiers. Give diagnostic criteria, if applicable                                                                                                                                                                                                                                                                      |
| ✓ | Data sources/<br>measurement 8* | For each variable of interest, give sources of data and details of methods of assessment (measurement). Describe comparability of assessment methods if there is more than one group                                                                                                                                                                                                                          |
| ✓ | Bias 9                          | Describe any efforts to address potential sources of bias                                                                                                                                                                                                                                                                                                                                                     |
| ✓ | Study size 10                   | Explain how the study size was arrived at                                                                                                                                                                                                                                                                                                                                                                     |
| ✓ | Quantitative variables 11       | Explain how quantitative variables were handled in the analyses. If applicable, describe which groupings were chosen and why                                                                                                                                                                                                                                                                                  |
| ✓ | Statistical methods 12          | (a) Describe all statistical methods, including those used to control for confounding<br>(b) Describe any methods used to examine subgroups and interactions<br>(c) Explain how missing data were addressed<br>(d) If applicable, explain how loss to follow-up was addressed<br>(e) Describe any sensitivity analyses                                                                                        |
|   | <b>Results</b>                  |                                                                                                                                                                                                                                                                                                                                                                                                               |
| ✓ | Participants 13*                | (a) Report numbers of individuals at each stage of study—eg numbers potentially eligible, examined for eligibility, confirmed eligible, included in the study, completing follow-up, and analysed<br>(b) Give reasons for non-participation at each stage<br>(c) Consider use of a flow diagram                                                                                                               |
| ✓ | Descriptive data 14*            | (a) Give characteristics of study participants (eg demographic, clinical, social) and information on exposures and potential confounders<br>(b) Indicate number of participants with missing data for each variable of interest<br>(c) Summarise follow-up time (eg, average and total amount)                                                                                                                |
| ✓ | Outcome data 15*                | Report numbers of outcome events or summary measures over time                                                                                                                                                                                                                                                                                                                                                |
| ✓ | Main results 16                 | (a) Give unadjusted estimates and, if applicable, confounder-adjusted estimates and their precision (eg, 95% confidence interval). Make clear which confounders were adjusted for and why they were included<br>(b) Report category boundaries when continuous variables were categorized<br>(c) If relevant, consider translating estimates of relative risk into absolute risk for a meaningful time period |

|                          |                  |    |                                                                                                                                                                            |
|--------------------------|------------------|----|----------------------------------------------------------------------------------------------------------------------------------------------------------------------------|
| ✓                        | Other analyses   | 17 | Report other analyses done—eg analyses of subgroups and interactions, and sensitivity analyses                                                                             |
| <b>Discussion</b>        |                  |    |                                                                                                                                                                            |
| ✓                        | Key results      | 18 | Summarise key results with reference to study objectives                                                                                                                   |
| ✓                        | Limitations      | 19 | Discuss limitations of the study, taking into account sources of potential bias or imprecision. Discuss both direction and magnitude of any potential bias                 |
| ✓                        | Interpretation   | 20 | Give a cautious overall interpretation of results considering objectives, limitations, multiplicity of analyses, results from similar studies, and other relevant evidence |
| ✓                        | Generalisability | 21 | Discuss the generalisability (external validity) of the study results                                                                                                      |
| <b>Other information</b> |                  |    |                                                                                                                                                                            |
| ✓                        | Funding          | 22 | Give the source of funding and the role of the funders for the present study and, if applicable, for the original study on which the present article is based              |

\*Give information separately for exposed and unexposed groups.

**Note:** An Explanation and Elaboration article discusses each checklist item and gives methodological background and published examples of transparent reporting. The STROBE checklist is best used in conjunction with this article (freely available on the Web sites of PLoS Medicine at <http://www.plosmedicine.org/>, Annals of Internal Medicine at <http://www.annals.org/>, and Epidemiology at <http://www.epidem.com/>). Information on the STROBE Initiative is available at <http://www.strobe-statement.org>.

# BMJ Open

## Multi-state Markov model application for blood pressure transition among the Chinese elderly population: A quantitative longitudinal study

|                                 |                                                                                                                                                                                                                                                                                                                                                                                                                                                                                                                                                                      |
|---------------------------------|----------------------------------------------------------------------------------------------------------------------------------------------------------------------------------------------------------------------------------------------------------------------------------------------------------------------------------------------------------------------------------------------------------------------------------------------------------------------------------------------------------------------------------------------------------------------|
| Journal:                        | <i>BMJ Open</i>                                                                                                                                                                                                                                                                                                                                                                                                                                                                                                                                                      |
| Manuscript ID                   | bmjopen-2021-059805.R1                                                                                                                                                                                                                                                                                                                                                                                                                                                                                                                                               |
| Article Type:                   | Original research                                                                                                                                                                                                                                                                                                                                                                                                                                                                                                                                                    |
| Date Submitted by the Author:   | 20-Apr-2022                                                                                                                                                                                                                                                                                                                                                                                                                                                                                                                                                          |
| Complete List of Authors:       | Zheng, Xujuan; Shenzhen University, Health Science Center<br>Xiong, Juan; Shenzhen University, School of Public Health<br>Zhang, Yiqin ; the No.2 Affiliated Hospital of Xiamen Medical College, Nephrology<br>Xu, Liping; the No.2 Affiliated Hospital of Xiamen Medical College, Nephrology<br>Zhou, Lina; the No.2 Affiliated Hospital of Xiamen Medical College, Nephrology<br>Zhao, Bin; Affiliated Xiangnan Hospital of Xiamen University, Department of medical laboratory<br>Wang, Yuxin; the No.2 Affiliated Hospital of Xiamen Medical College, Nephrology |
| <b>Primary Subject Heading</b>: | Health services research                                                                                                                                                                                                                                                                                                                                                                                                                                                                                                                                             |
| Secondary Subject Heading:      | Health services research, Public health, Cardiovascular medicine                                                                                                                                                                                                                                                                                                                                                                                                                                                                                                     |
| Keywords:                       | Hypertension < CARDIOLOGY, EPIDEMIOLOGY, PUBLIC HEALTH                                                                                                                                                                                                                                                                                                                                                                                                                                                                                                               |
|                                 |                                                                                                                                                                                                                                                                                                                                                                                                                                                                                                                                                                      |

SCHOLARONE™  
Manuscripts

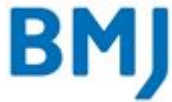

I, the Submitting Author has the right to grant and does grant on behalf of all authors of the Work (as defined in the below author licence), an exclusive licence and/or a non-exclusive licence for contributions from authors who are: i) UK Crown employees; ii) where BMJ has agreed a CC-BY licence shall apply, and/or iii) in accordance with the terms applicable for US Federal Government officers or employees acting as part of their official duties; on a worldwide, perpetual, irrevocable, royalty-free basis to BMJ Publishing Group Ltd ("BMJ") its licensees and where the relevant Journal is co-owned by BMJ to the co-owners of the Journal, to publish the Work in this journal and any other BMJ products and to exploit all rights, as set out in our [licence](#).

The Submitting Author accepts and understands that any supply made under these terms is made by BMJ to the Submitting Author unless you are acting as an employee on behalf of your employer or a postgraduate student of an affiliated institution which is paying any applicable article publishing charge ("APC") for Open Access articles. Where the Submitting Author wishes to make the Work available on an Open Access basis (and intends to pay the relevant APC), the terms of reuse of such Open Access shall be governed by a Creative Commons licence – details of these licences and which [Creative Commons](#) licence will apply to this Work are set out in our licence referred to above.

Other than as permitted in any relevant BMJ Author's Self Archiving Policies, I confirm this Work has not been accepted for publication elsewhere, is not being considered for publication elsewhere and does not duplicate material already published. I confirm all authors consent to publication of this Work and authorise the granting of this licence.

**Title page****• Short informative title**

Multi-state Markov model application for blood pressure transition among the Chinese elderly population: A quantitative longitudinal study

**• Short running title**

Multi-state Markov model for blood pressure

**• List of all authors**

Xujuan **Zheng**<sup>1</sup> \$, Juan **Xiong**<sup>1</sup> \$, Yiqin **Zhang**<sup>2</sup>, Liping **Xu**<sup>2</sup>, Lina **Zhou**<sup>2</sup>, Bin **Zhao**<sup>\*3</sup>, Yuxin **Wang**<sup>\*2</sup>

**Affiliations**

<sup>1</sup> Health Science Centre, Shenzhen University, Shenzhen, China

<sup>2</sup> Dept. Nephrology, the No.2 Affiliated Hospital of Xiamen Medical College, Xiamen, China

<sup>3</sup> Department of medical laboratory, Xiang'an Hospital Affiliated to Xiamen University, Xiamen, China

**Corresponding author:**

\* Bin Zhao, Department of medical laboratory, Xiang'an Hospital Affiliated to Xiamen University, Xiang'an District, Xiamen, China, 361000.

email: [393603468@qq.com](mailto:393603468@qq.com)

\* Yuxin Wang, Dept. Nephrology, the No.2 Affiliated Hospital of Xiamen Medical College, Xiamen, China, 361000.

email: [wyx\\_1000@126.com](mailto:wyx_1000@126.com)

**Other author footnotes:**

\$Xujuan Zheng and Juan Xiong made **equal contributions** to this manuscript

**Additional emails**

Xujuan Zheng email: [zhengxujuan@szu.edu.cn](mailto:zhengxujuan@szu.edu.cn)

Juan Xiong email: [jxiong@szu.edu.cn](mailto:jxiong@szu.edu.cn)

Yiqin Zhang email: [553098786@qq.com](mailto:553098786@qq.com)

Liping Xu email: [469722875@qq.com](mailto:469722875@qq.com)

Lina Zhou email: [zhoulina154@126.com](mailto:zhoulina154@126.com)

**Keywords:** Blood pressure; Hypertension; Probability; Health services for the elderly; Chinese; Multi-state Markov model.

**Word count:** 3541

**Abstract count:** 299

**Number of Reference:** 44

## Multi-state Markov model application for blood pressure transition among the Chinese elderly population: A quantitative longitudinal study

### Abstract

**Objective:** To explore the transitions of different blood pressure states based on a multi-state Markov model among the Chinese elderly population.

**Setting:** A community health center in Xiamen, China.

**Participants:** 1833 elderly Chinese people.

**Methods:** A multi-state Markov model was built based on 5001 blood pressure measurements from 2015 to 2020. Research was conducted to explore the process of hypertension progression, providing information on the transition probability, hazard ratio, and the mean sojourn time in three blood pressure states, namely normal state, elevated state, and hypertensive state.

**Results:** Probabilities of moving from the normal state to the hypertensive state in the first year were 16.97% (female) and 21.73% (male); they increased dramatically to 47.31% (female) and 51.70% (male) within a 3-year follow-up period. The sojourn time in the normal state was  $1.5 \pm 0.08$  years. Elderly women in the normal state had a 16.97%, 33.30%, and 47.31% chance of progressing to hypertension within 1, 2, and 3 years, respectively. The corresponding probabilities for elderly men were 21.73%, 38.56%, and 51.70%, respectively. For elderly women starting in the elevated state, the probabilities of developing hypertension were 25.07%, 43.03%, and 56.32% in the next one, two, and three years, respectively; while the corresponding changes for elderly men were 20.96%, 37.65%, and 50.86%. Increasing age, body mass index (BMI), and glucose were associated with the probability of developing hypertension from the normal state or elevated state.

**Conclusions:** Preventive actions against progression to hypertension should be conducted at an early stage. More awareness should be paid to elderly women with elevated state and elderly men with normal state. Increasing age, BMI, and glucose were critical risk factors for developing hypertension. The derived transition probabilities and sojourn time can serve as a significant reference for making targeted interventions for hypertension progression among the Chinese elderly population.

**Keywords:** Blood pressure; Hypertension; Probability; Health services for the elderly; Chinese; Multi-state Markov model



### Strengths and limitations of this study

- ▶ A multi-state Markov model was used to explore the state transition dynamics of three blood pressure states, and to investigate the risk factors affecting the progression of hypertension in the Chinese elderly population.
- ▶ The derived transition probabilities and sojourn time can serve as a significant reference for the development of proactive and targeted interventions for hypertension progression among the Chinese elderly population.
- ▶ Owing to time and financial limitations, the research only focused on the cohort population over five years in one city.
- ▶ The hypertensive state was regarded as an absorbing state, meaning that the reverse transition from the hypertensive state to the normal or elevated state was not considered.
- ▶ Some significant covariates such as various life habits of diet, smoking, exercise, and psychological status were not covered, but are worthy of investigation in further research.

### Introduction

Hypertension is defined by Chinese and European guidelines as an office systolic blood pressure (SBP) of  $\geq 140$  mmHg and/or diastolic blood pressure (DBP) of  $\geq 90$  mmHg without any antihypertensive medication [1-2]. As a significantly increasing global health issue, hypertension is the leading cause of cardiovascular and cerebrovascular diseases, chronic kidney disease, and cognitive dysfunction [3-8]. It is likewise regarded as the most frequent modifiable risk factor for cardiovascular-related mortality, morbidity, disability, and health expense in the global population [9-14]. During the last decade, the prevalence of hypertension has rapidly increased [15-16]. At present, approximately 1.13 billion people worldwide live with hypertension, and the number is predicted to increase by 15–20% by 2025 [17]. In China, hypertension is emerging as a major public health problem and influences more than 270 million people [18-19]; its incidence increases with age, affecting more than 60% of people older than 60 years [20].

Sound evidence has identified various risk factors for hypertension, including genetic, environmental, and social-demographic perspectives, such as family history, diet, stress, obesity, age, gender, and hypercholesterolemia [21-24]. However, the methods commonly used to discover these risk factors in previous research, namely, logistic regression and Cox proportional models, do not provide adequate information about the dynamic process of blood pressure evolution [24-27]. Indeed, the natural

1  
2  
3 process of hypertension involves dynamic evolution, and hypertensive individuals  
4 experience different stages along its progression trajectory with the passage of time  
5 [28]. According to the hypertension prevention guidelines in China, blood pressure can  
6 be divided into three categories: the normal state, elevated state, and hypertensive  
7 state [1, 29]. The elevated state is the blood pressure range of prehypertension, with  
8 a value of 120–139 mmHg for SBP and 80–89 mmHg for DBP without antihypertensive  
9 medication; it represents the transition from a normal state to hypertension in clinical  
10 diagnosis [1]. In addition to the hypertensive state, the elevated state is also related  
11 to a higher risk of fatal cardiovascular disease. Therefore, it is imperative to investigate  
12 the transition patterns among different levels of blood pressure for early detection and  
13 prevention [30].  
14  
15  
16  
17  
18  
19  
20

21 Multi-state Markov modeling has been widely used in healthcare research to analyze  
22 the progression of various chronic diseases, such as hepatitis [31], diabetes [32],  
23 chronic kidney disease [33], and Alzheimer's disease [34]. It likewise can be used to  
24 analyze the transition from a normal (non-disease) state, through a mild state to a  
25 severe and/or death state [35]. As an effective method for dealing with repeated  
26 measurement data, multi-state Markov modeling can provide information on inter-  
27 state transitions, transition probability, hazard ratio, and the mean sojourn time of the  
28 transition in the cohort population [28-29]. There have been two studies exploring  
29 transition of the blood pressure states based on multi-state Markov models. One study  
30 focused on the US working population aged 18–54 years [28]; the other study focused  
31 on the Chinese population with a mean age of  $37.54 \pm 13.80$  years. Compared with the  
32 young working population, elderly people have a higher incidence of hypertension, and  
33 are worthy of more attention and investigation [29].  
34  
35  
36  
37  
38  
39  
40  
41

42 Therefore, our research contributed to exploring the state transition dynamics of three  
43 blood pressure states via multi-state Markov modeling and investigating the risk  
44 factors associated with the progression of hypertension among the Chinese elderly  
45 population, which have not been explored in the existing literature. Furthermore, our  
46 study estimated, for this group of elderly persons, the sojourn time in each blood  
47 pressure state and the transition probabilities from one state to other states, to provide  
48 initial statistical foundations for early hypertension prevention, timely targeted  
49 interventions, and effective geriatric nursing.  
50  
51  
52  
53  
54  
55  
56  
57  
58  
59  
60

## Methods

### Aim and Design

A quantitative longitudinal study was conducted to explore the transitions of different blood pressure states based on a multi-state Markov model among the Chinese elderly population.

### Participants

This research included individuals who volunteered to have a community-organized free annual physical examination in a community health center of a hospital funded by the Chinese Government from 2015 to 2020. The inclusion criteria were participants aged 60 years or above, who attended at least two checkups, including at least one for baseline data and one for follow-up data. The exclusion criteria were individuals who had hypertension at baseline, or whose record had missing data on age, gender, blood pressure, BMI, or blood glucose. After preprocessing, a total of 1833 individuals were included in the study. The maximum follow-up time was 5.7 years, and the mean follow-up was approximately 2.5 years.

### Patient and public involvement

Patients or the public were not involved in the design, or conduct, or reporting, or dissemination plans of this research. Patients or the public were not invited to contribute to the writing or editing of this article for readability or accuracy.

### Data Collection

This study used data from the annual physical examination. During each annual checkup, the individual's height, weight, abdominal circumference, blood pressure, and electrocardiogram were assessed, and a blood test was taken to measure their blood glucose. Socio-demographic data such as age, gender, and marital status were collected by health professionals. This study was approved by the ethics committee of the No. 2 Affiliated Hospital of Xiamen Medical College, Xiamen City, southeast China. All participants provided their written informed consent before data collection, and were informed of the purpose and process of the study and their freedom to withdraw whenever they chose.

Blood pressure was measured by professional medical staff using an Omron electronic sphygmomanometer with appropriately sized cuffs, measuring SBP and DBP in the resting, sitting position on the right and left upper arm, respectively [36-37]. All participants gave at least two mandatory blood pressure measurements, with an

1  
2  
3 interval of ten minutes [38], and the average of two measurements was used as the  
4 result. If the numerical difference of the SBP or DBP readings between the two  
5 mandatory measurements was more than 10 mmHg, a third blood pressure  
6 measurement was conducted to avoid error. In order to improve the accuracy of  
7 measurement, participants were asked to relax for >5 min, and avoid caffeine,  
8 exercise, and smoking for at least 30 min before measurement. Neither the participant  
9 nor the observer was allowed to talk during the rest period or during the measurement.  
10  
11  
12  
13  
14

15 In the research, three blood pressure states were categorized according to the Chinese  
16 Hypertension Prevention Guide 2010 Third Edition [1]: (1) normal state: SBP less than  
17 120 mmHg, DBP less than 80 mmHg, and not taking any antihypertensive medicine;  
18 (2) elevated state: SBP 120–139 mmHg (DBP <90 mmHg) or DBP 80–89 mmHg (SBP  
19 <140 mmHg), and not taking any antihypertensive medicine; (3) hypertensive state:  
20 SBP at least 140 mmHg or DBP at least 90 mmHg or taking any antihypertensive  
21 medicine.  
22  
23  
24  
25  
26

27 The body mass index (BMI) is the ratio of a person's weight (in kilograms) to the  
28 square of their height (in meters). In this study, four BMI categories were defined by  
29 the Chinese Center for Disease Control and Prevention: (1) underweight: BMI less than  
30 18.5 kg/m<sup>2</sup>; (2) normal: BMI ranging from 18.5 to 24.0 kg/m<sup>2</sup>; (3) overweight: BMI  
31 ranging from 24.0 kg/m<sup>2</sup> to 28.0 kg/m<sup>2</sup>; (4) obese: BMI higher than 28.0 kg/m<sup>2</sup>.  
32  
33  
34  
35

### 36 **Statistical Analysis**

37 Descriptive analysis was used to describe the social-demographic and clinical data. For  
38 continuous data, the mean and standard deviation (SD) were used, and for categorical  
39 data, frequencies and percentages were used. Hazard ratios (HRs) and corresponding  
40 95% confidence intervals (CIs) were used in the statistical analysis. The multi-state  
41 Markov model was built using the "msm" package of R software [39]. The  $\chi^2$  test was  
42 used to compare differences in baseline characteristics between the male and female  
43 participants. All the statistical analyses were conducted using R software (R  
44 Foundation, Vienna, Austria). A *P*-value less than 0.05 was considered statistically  
45 significant.  
46  
47  
48  
49  
50

51 In the Markov model of this study, there are three blood pressure states of interest:  
52 state 1 (normal state), state 2 (elevated state), and state 3 (hypertensive state). A  
53 state change is regarded as a transition. If a state can continue to transition to another,  
54  
55  
56  
57  
58  
59  
60

1  
2  
3 it is classified as a transient state; otherwise, it is an absorbing state, meaning a  
4 lifelong health condition [39]. In the research, both the normal state and the elevated  
5 state were transient states as the model assumed that the two states could transition  
6 to each other as well as to the hypertensive state. By contrast, once an individual  
7 transitioned to the hypertension state, he or she could not return to the normal state  
8 or elevated state because the transitions from hypertension to the other states were  
9 not natural processes [28].  
10  
11  
12  
13

14  
15 Six possible transitions among the three states are illustrated in Figure 1. For example,  
16 the blood pressure of an individual can stay in the current state or transition to any of  
17 the other states, such as normal → normal, normal → elevated, normal →  
18 hypertensive, elevated → elevated, elevated → normal, elevated → hypertensive. The  
19 sojourn time means the average length of time the blood pressure remained in a  
20 transient state before transitioning to a new state.  
21  
22  
23  
24

## 25 Results

### 26 Baseline Characteristics of Participants

27  
28 In this study, 1833 participants were included, with 5001 measurement records. At  
29 the baseline checkup, 443 (25.17%) participants were in the normal state and 1390  
30 (75.83%) participants were in the elevated state. However, at the final checkup, 247  
31 (13.48%) individuals were in the normal state, 447 (24.39%) individuals were in the  
32 elevated state, and 1139 (62.14%) individuals were in the hypertensive state (Table  
33 1).  
34  
35  
36  
37  
38

39 **Table 1** The statistic of blood pressure state transition

| Blood pressure state | Baseline checkup N(%) | Final checkup N(%) |
|----------------------|-----------------------|--------------------|
| Normal state         | 443 (24.17)           | 247 (13.48)        |
| Elevated state       | 1390 (75.83)          | 447 (24.39)        |
| Hypertensive state   | 0 (0.00)              | 1139 (62.14)       |
| Total                | 1833 (100.00)         | 1833 (100.00)      |

40  
41  
42  
43  
44  
45  
46  
47  
48  
49  
50 Among these participants, the mean age was 65.5 (6.04) years, and 967 (52.76%)  
51 were female. The baseline characteristics of these participants, and their discrepancies  
52 between male and female participants, are summarized in Table 2.  
53  
54  
55  
56  
57  
58  
59  
60

**Table 2** Baseline characteristics of participants

| Variable                 | Overall, N = 1,833 <sup>1</sup> | Male, N = 866 | Female, N = 967 | p-value <sup>2</sup> |
|--------------------------|---------------------------------|---------------|-----------------|----------------------|
| <b>Age</b> Mean (SD)     | 65.5 (6.04)                     | 65.7 (5.85)   | 65.4 (6.20)     | 0.031                |
| <b>Married</b>           | 1,605/1,830 (88%)               | 817/865 (94%) | 788/965 (82%)   | <0.001               |
| <b>Blood pressure</b>    |                                 |               |                 | 0.002                |
| Normal state             | 443/1,833 (24%)                 | 181/866 (21%) | 262/967 (27%)   |                      |
| Elevated state           | 1,390/1,833 (76%)               | 685/866 (79%) | 705/967 (73%)   |                      |
| <b>Glucose</b> Mean (SD) | 5.6 (1.67)                      | 5.5 (1.38)    | 5.8 (1.88)      | <0.001               |
| <b>Diabetes</b>          | 119/1,833 (6.5%)                | 51/866 (5.9%) | 68/967 (7.0%)   | 0.300                |
| <b>BMI</b>               |                                 |               |                 | <0.001               |
| Normal                   | 1,160/1,833 (63%)               | 579/866 (67%) | 581/967 (60%)   |                      |
| Obese                    | 78/1,833 (4.3%)                 | 28/866 (3.2%) | 50/967 (5.2%)   |                      |
| Overweight               | 421/1,833 (23%)                 | 170/866 (20%) | 251/967 (26%)   |                      |
| Underweight              | 174/1,833 (9.5%)                | 89/866 (10%)  | 85/967 (8.8%)   |                      |
| <b>Abnormal ECG</b>      | 466/1,662 (28%)                 | 248/779 (32%) | 218/883 (25%)   | 0.001                |

<sup>1</sup>Mean (SD), n/N (%); <sup>2</sup>Wilcoxon rank sum test; Pearson's chi-squared test  
 BMI: Body mass index, ECG: Electrocardiogram

### Transition Frequency from One Checkup to the Following Checkup

Among 5001 blood pressure measurements in 1833 elderly people over the period 2015–2020, 1833 measurements were conducted at the baseline checkup and 3168 measurements were conducted at follow-up checkups. The numbers of transitions from one checkup (given by the row state) to the next one (given by the column state) are shown in Table 3.

**Table 3** Observed number of transitions from one checkup to the next checkup

| From\To  | Normal      | Elevated     | Hypertensive | Total      |
|----------|-------------|--------------|--------------|------------|
| Normal   | 430(47.25%) | 242(26.59%)  | 238(26.15%)  | 910(100%)  |
| Elevated | 284(12.58%) | 1073(47.52%) | 901(39.90%)  | 2258(100%) |

Of the 3168 transitions, 26.59% showed deterioration from the normal state to the elevated state at the next checkup, 26.15% from the normal state to the hypertensive state, and 47.25% with the normal state showed no change. Similarly, there were 1073 occurrences where participants remained in the elevated state, 901 (39.90%) cases where participants progressed from the elevated state to hypertension, while

1  
2  
3 284 (12.25%) cases showed alleviation from the elevated state to the normal state at  
4 the following visit.  
5  
6

7  
8 The six possible blood pressure state transitions with the corresponding probabilities  
9 over 1-year, 2-year, and 3-year periods, stratified by gender, are illustrated in Figures  
10 2 and 3. Compared with male participants, female participants have lower probabilities  
11 of transitioning from the normal state to the hypertensive state, but have higher  
12 probabilities of moving from the elevated state to the hypertensive state over any  
13 period of time. For instance, elderly women in the normal state had a 16.97%,  
14 33.30%, and 47.31% chance of progressing to hypertension if the next checkup was  
15 performed after an interval of 1 year, 2 years, and 3 years, respectively. By contrast,  
16 the chances of elderly men moving from the normal state to the hypertensive state  
17 were 21.73%, 38.56%, and 51.70% within 1, 2, and 3 years, respectively. For elderly  
18 women starting in the elevated state, the probabilities of developing hypertension were  
19 25.07%, 43.03%, and 56.32% in the next 1, 2, and 3 years, respectively; while the  
20 corresponding probabilities for elderly men transitioning between the two states were  
21 20.96%, 37.65%, and 50.86%. As time went by, both female and male participants  
22 had a higher probability of developing hypertension. For example, the probabilities of  
23 changing from the normal state to the hypertensive state over a 1-year follow-up  
24 period were 16.97% (female) and 21.73% (male), which increased dramatically to  
25 47.31% (female) and 51.70% (male) within the 3-year follow-up period.  
26  
27  
28  
29  
30  
31  
32  
33  
34  
35

36 We further stratified the study individuals by gender and age group, and the transition  
37 probabilities in the 3rd year originating from the normal state or the elevated state at  
38 baseline are illustrated in Figure 4 and Figure 5, respectively. The detailed  
39 corresponding numerical values are described in Table S1 (see Supplementary  
40 material). As shown, both female and male participants with age  $\geq 65$  years were more  
41 likely to progress to hypertension whether starting from the normal state or the  
42 elevated state within the next 3 years, in comparison with the corresponding  
43 participants who were  $<65$  years old.  
44  
45  
46  
47  
48  
49

50 The sojourn time for the normal state in the study cohort was  $1.5 \pm 0.08$  years, and the  
51 duration of the elevated state was  $2.0 \pm 0.07$  years.  
52  
53  
54  
55  
56  
57  
58  
59  
60

### Covariate Effects on Blood Pressure State Transitions

The covariates included in the research were age, gender, marriage, BMI, glucose, and ECG. The effects of the covariates on blood pressure state transition with statistical significance are summarized in Table 4. Gender, BMI, age and glucose had some significant associations with possible transitions. For example, increasing age, BMI, and glucose were risk factors for developing hypertension from the normal state or elevated state (HR: 1.04–1.12). Female participants and participants with higher glucose levels were less likely to return from the elevated state to the normal state than their male counterparts (HR: 0.61–0.83).

**Table 4** Covariate effects on blood pressure state transitions

| Covariate       | Normal–Elevated<br>HR (95% CI) | Normal–Hypertensive<br>HR (95% CI) | Elevated–Normal<br>HR (95% CI) | Elevated –Hypertensive<br>HR (95% CI) |
|-----------------|--------------------------------|------------------------------------|--------------------------------|---------------------------------------|
| Gender          | 1.131 (0.807, 1.586)           | 0.544 (0.288, 1.028)               | 0.606 (0.412, 0.891)           | 1.461 (0.999, 2.136)                  |
| BMI             | 1.038 (0.992, 1.086)           | 1.124 (1.058, 1.195)               | 1.017 (0.963, 1.074)           | 1.019 (0.983, 1.057)                  |
| Age             | 1.016 (0.980, 1.054)           | 1.042 (1.010, 1.075)               | 1.018 (0.990, 1.047)           | 1.017 (0.997, 1.037)                  |
| Glucose         | 1.013 (0.947, 1.083)           | 0.876 (0.697, 1.102)               | 0.827 (0.715, 0.956)           | 1.054 (1.012, 1.097)                  |
| Marriage        | 0.989 (0.574, 1.702)           | 0.961 (0.347, 2.665)               | 1.073 (0.607, 1.897)           | 0.866 (0.630, 1.189)                  |
| Abnormal<br>ECG | 0.737 (0.516, 1.052)           | 0.920 (0.479, 1.767)               | 0.794 (0.545, 1.155)           | 1.026 (0.825, 1.275)                  |

Reference categories of covariates: gender, ref=male; marriage, ref=single/divorced/widowed; abnormal ECG, ref=normal.

### Survival Probability Based on the Multi-state Markov Model

The multi-state Markov model can be used to infer the survival probability for each subgroup in the future, which may provide insightful information for individuals. In this study, the survival probability represents the probability of not transitioning into the hypertensive state. Survival probability curves over 5 years for all subgroups stratified by female and male categories are given in Figures 6 and 7. The survival probability decreased significantly with increased time among all subgroups. As shown in Figure 6, the survival probability for female participants originating from the normal state was similar to the probability for male participants (no difference,  $P=0.70$ ). Figure 7 illustrates that male participants starting from the elevated state had a higher survival probability over 5 years than female participants ( $P=0.01$ ).



## Discussion

Sound evidence has verified that, when compared with the young population, elderly people have a higher incidence of hypertension, which is worthy of more attention and investigation [29]. In 2020, there were 254 million people aged  $\geq 60$  years in China, accounting for 18.1% of the population [40]. Therefore, in this study, we explored the state transition dynamics of three blood pressure states via multi-state Markov models and investigated the risk factors associated with the progression of hypertension in the elderly population in China, which has not been explored in the existing literature.

There are some significant findings in the research. First, our study found that, of the 3168 transitions, 26.15% of participants showed deterioration from the normal state to the hypertensive state at the next checkup, much higher than the corresponding 16.98% and 9.18% reported in previous studies of the working population [28-29]. This further confirmed that older people should be given much more attention in hypertension prevention and research. Second, we found that both female and male participants in the normal state had a low probability of developing hypertension in the first year; however, this probability increased substantially in the following 3 years, which is consistent with the prior research on young people [28-29]. In this study, the percentage changes from the normal state to the hypertensive state in the first year were 16.97% (female) and 21.73% (male), which increased dramatically to 47.31% (female) and 51.70% (male) within the 3-year follow-up period. Furthermore, the sojourn time in the normal state was  $1.5 \pm 0.08$  years in the study cohort. These results indicate that preventive actions and effective intervention on hypertension progression should be conducted at an early stage, and at least one yearly checkup is strongly recommended for the elderly population. Third, male participants were found to have high probabilities of transitioning from the normal state to hypertension, in comparison with female participants. For example, elderly women in the normal state have a 16.97%, 33.30%, and 47.31% chance of progressing to hypertension within 1, 2, and 3 years, respectively. By contrast, the corresponding probabilities for elderly men were 21.73%, 38.56%, and 51.70%, respectively. The findings align with those of a prior study that indicated that more attention should be paid to elderly men with normotension [28, 41, and 42].

However, we also found that elderly female participants had higher probabilities of developing from the elevated state to the hypertensive state than male participants. For instance, for elderly women starting in the elevated state, the probabilities of

1  
2  
3 developing hypertension were 25.07%, 43.03%, and 56.32% in the next 1, 2, and 3  
4 years, respectively; the corresponding probabilities for elderly men were 20.96%,  
5 37.65%, and 50.86%, respectively. Female participants were less likely to return from  
6 the elevated state to the normal state than their male counterparts in the study (HR:  
7 0.61, 95% CI: 0.41–0.89). Our survival probability pilot also illustrated that male  
8 participants starting from the elevated state had a higher survival probability over 5  
9 years than female participants ( $P=0.01$ ). The above findings show that more attention  
10 should be paid to the progression from the elevated state to hypertension in elderly  
11 women. In this study, if an elderly individual was diagnosed with elevated blood  
12 pressure, health professionals in the community health center provided a face-to-face  
13 health education session and sent text messages to the patient describing how to  
14 prevent hypertension through diet, exercise, daily blood pressure testing, etc.  
15  
16  
17  
18  
19  
20  
21  
22

23 In addition to age and gender, as discussed above, higher BMI (HR: 1.12, 95% CI:  
24 1.06–1.20) and blood glucose levels (HR: 1.05, 95% CI: 1.01–1.10) were identified  
25 to be risk factors for developing hypertension from the normal state or elevated state.  
26 Previous research has also found that the HR for transitioning from the normal state  
27 to the hypertensive state increases with higher BMI values [28, 29, and 43] and higher  
28 glucose levels [44].  
29  
30  
31  
32

33 In summary, the research has made key contributions. First, a multi-state Markov  
34 model was used to explore the state transition dynamics of three blood pressure  
35 states, and to investigate how several important covariates affected the progression  
36 or alleviation of hypertension in the Chinese elderly population. Furthermore, through  
37 the developed model, the sojourn time in each blood pressure state and the transition  
38 probabilities from one state to another state were estimated, thereby supplying  
39 statistical foundations for preventive actions and effective intervention in the  
40 progression of hypertension for elderly people.  
41  
42  
43  
44  
45

#### 46 **Limitations**

47 The limitations of the study can be summarized as follows. (1) Owing to time and  
48 financial limitations, we only focused on a cohort population for five years in one city;  
49 thus the study findings may not be representative and fit for extrapolation. (2) In this  
50 study, the hypertensive state was regarded as an absorbing state, meaning that the  
51 reverse transition from a hypertensive state to a normal or elevated state was not  
52 considered. (3) Some significant covariates, such as various lifestyle habits of diet,  
53  
54  
55  
56  
57  
58  
59

1  
2  
3 smoking, exercise, other medical conditions, and psychological status, were not  
4 covered in the current study, and are worthy of investigation in further research.  
5  
6  
7

### 8 **Conclusions**

9 The findings regarding the three blood pressure state transition probabilities should  
10 increase awareness of the timely prevention for elderly women with elevated blood  
11 pressure and elderly men with normal blood pressure. Preventive actions and effective  
12 intervention on hypertension progression should be conducted at an early stage, and  
13 at least one yearly checkup is strongly recommended for elderly people. Increasing  
14 age, BMI, and blood glucose were risk factors for developing hypertension from the  
15 normal state or elevated state. The derived transition probabilities and sojourn time  
16 can serve as a significant reference for health professionals when developing proactive  
17 and targeted interventions for hypertension progression among the Chinese elderly  
18 population.  
19  
20  
21  
22  
23  
24  
25

26 **Figure 1:** The three blood pressure state transitions in the Markov model

27 **Figure 2:** State transition diagrams for female participants

28 **Figure 3:** State transition diagrams for male participants

29 **Figure 4:** Transition probabilities from the normal state in the 3rd year, stratified by  
30 gender and age group

31 **Figure 5:** Transition probabilities from the elevated state in the 3rd year, stratified by  
32 gender and age group

33 **Figure 6** Survival distribution starting from the normal state

34 **Figure 7** Survival distribution starting from the elevated state

35 **Table S1** Shown in the supplementary material  
36  
37  
38  
39  
40  
41  
42  
43

### 44 **Acknowledgements**

45 We would like to thank all participants who voluntarily participated in this study. We  
46 thank International Science Editing (<http://www.internationalscienceediting.com>) for  
47 editing this manuscript.  
48  
49  
50  
51  
52

### 53 **Contributor**

54 XZ and JX performed the statistical analysis and interpretation and wrote the  
55 manuscript. YZ, LX, and LZ contributed to the conceptualization of the research  
56  
57  
58  
59  
60

process and critically reviewed the manuscript. BZ and YW were responsible for the overall content as guarantors. All authors read and approved the final manuscript.

### Funding

YW was supported by grants from the Fujian Province Planning Project of Science and Technology (2019D015). JX was supported by the Medical Science and Technology Research Fund Project of Guangdong Province (grant no. A2020405).

### Ethics approval

This study was approved by the review committee of the No. 2 Affiliated Hospital of Xiamen Medical College. All participants provided their informed consent before data collection, and were informed of the purpose and process of the study and their freedom to withdraw whenever they chose.

### Data availability statement

The data presented in this study are available from the corresponding author up on a reasonable request.

### Conflicts of Interest

None

### References

1. Liu LS. 2010. Chinese guidelines for the management of hypertension. *Zhonghua Xin Xue Guan Bing Magazine* 2011; 39:579–615.
2. Williams B, Mancia G, Spiering W, *et al.* ESC/ESH Guidelines for the management of arterial hypertension. *Eur Heart J* 2018;39(33):3021–3104. doi:10.1080/08037051.2018.1527177.
3. Herman WW, Konzelman JL, Prisant LM. Joint national committee on prevention, detection, evaluation, and treatment of high blood pressure. The seventh report of the joint national committee on prevention, detection, evaluation, and treatment of high blood pressure bethesda (MD): National heart, lung, and blood institute (US) 2004.
4. Lawes CM, Hoorn SV, Rodgers A. Global burden of blood-pressure-related disease. *Lancet* 2008;371:1513–1518. doi: 10.1016/S0140-6736(08)60655-8.
5. Kokubo Y, Matsumoto C. Hypertension is a risk factor for several types of heart disease: review of prospective studies. *Adv Exp Med Biol* 2017;956:419–26. doi: 10.1007/5584\_2016\_99.
6. Oparil S, Acelajado MC, Bakris GL, *et al.* Hypertension. *Nat Rev Dis Primers* 2018;4(18014):1–21. doi: 10.1038/nrdp.2018.14.

- 1  
2  
3 7. Tackling G, Borhade MB, Tackling G, *et al.* Hypertensive heart disease.  
4 [Updated 2020 Jun 28]. In: StatPearls [Internet]. Treasure Island (FL):  
5 StatPearls Publishing 2020. <https://www.ncbi.nlm.nih.gov/books/NBK539800/>
- 6  
7  
8 8. Jan YT, Tsai PS, Longenecker CT, *et al.* Thoracic aortic calcification and pre-  
9 clinical hypertension by new 2017 ACC/AHA hypertension guidelines.  
10 *Diagnostics* 2021;11:1027.
- 11  
12 9. Ettehad D, Emdin CA, Kiran A, *et al.* Blood pressure lowering for prevention of  
13 cardiovascular disease and death: A systematic review and meta-analysis.  
14 *Lancet* 2016;387:957–967. doi: 10.1016/S0140-6736(15)01225-8.
- 15  
16 10. Khaja SU, Mathias KC, Bode ED, *et al.* Hypertension in the United States fire  
17 service. *Int. J. Environ. Res. Public Health* 2021;18:5432.  
18 dio:10.3390/ijerph18105432.
- 19  
20 11. GBD 2015 neurological disorders collaborator group. Global, regional, and  
21 national comparative risk assessment of 79 behavioral, environmental and  
22 occupational, and metabolic risks or clusters of risks, 1990–2015: A systematic  
23 analysis for the global burden of disease study 2015. *Lancet Neural*  
24 2017;16(388):877–97.
- 25  
26 12. Di Palo KE; Barone NJ. Hypertension and heart failure: Prevention, targets, and  
27 treatment. *Heart Fail. Clin.* 2020;16:99–106. doi: 10.1016/j.hfc.2019.09.001.
- 28  
29 13. Dominguez LJ, Veronese N, Barbagallo M. Magnesium and hypertension in old  
30 age. *Nutrients* 2021;13:139. dio: 10.3390/nu13010139.
- 31  
32 14. Ye X, Yi Q, Shao J, *et al.* Trends in prevalence of hypertension and hypertension  
33 phenotypes among Chinese children and adolescents over two decades (1991–  
34 2015). *Front. Cardiovasc. Med* 2021;8:627741. dio:  
35 10.3389/fcvm.2021.627741.
- 36  
37 15. Kearney PM, Whelton M, Reynolds K, *et al.* Global burden of hypertension:  
38 analysis of worldwide data. *Lancet* 2005;365(9455):217–223.
- 39  
40 16. Forouzanfar MH, Liu BP, Roth GA, *et al.* Global burden of hypertension and  
41 systolic blood pressure of at least 110 to 115 mm Hg, 1990–2015. *JAMA*  
42 2017;317(2):165–182. dio: 10.1001/jama.2016.19043.
- 43  
44 17. WHO. Hypertension. World Health Organisation. [https://www.who.](https://www.who.int/newsroom/factsheets/detail/hypertension)  
45 [int/newsroom/factsheets/detail/hypertension.](https://www.who.int/newsroom/factsheets/detail/hypertension) Published 2019. Accessed 2  
46 October 2020.
- 47  
48  
49  
50  
51  
52  
53  
54  
55  
56  
57  
58  
59  
60

- 1  
2  
3 18. Griffin G. Antiplatelet therapy and anticoagulation in patients with  
4 hypertension. *Am Fam Physician* 2005;71:897–9. doi:  
5 10.1001/jama.293.9.1123.  
6  
7  
8 19. Xiong X, Yang X, Liu Y, *et al*. Chinese herbal formulas for treating hypertension  
9 in traditional Chinese medicine: perspective of modern science. *Hypertens Res*  
10 2013;36:570–9. doi: 10.1038/hr.2013.18.  
11  
12 20. Chow CK, Teo KK, Rangarajan S, *et al*. Prevalence, awareness, treatment, and  
13 control of hypertension in rural and urban communities in high-, middle-, and  
14 low-income countries. *JAMA* 2013;310(9):959–968. dio:  
15 10.1001/jama.2013.184182.  
16  
17  
18 21. Patel RS, Masi S and Taddei S. Understanding the role of genetics in  
19 hypertension. *Eur. Heart J* 2017;38(29): 2309–2312. dio:  
20 10.1093/eurheartj/ehx273.  
21  
22  
23 22. Li C, Sun DD, Liu JL, *et al*. A prediction model of essential hypertension based  
24 on genetic and environmental risk factors in northern han Chinese. *Int. J. Med.*  
25 *Sci* 2019;16(6):793–799. dio: 10.7150/ijms.33967.  
26  
27  
28 23. Bigazzi R, Zagato L, Lanzani C, *et al*. Hypertension in high school students:  
29 Genetic and environmental factors: The HYGEF study. *Hypertension*  
30 2020;75:71–78. dio: 10.1161/HYPERTENSIONAHA.119.13818.  
31  
32  
33 24. Zhang YY, Yang H, Ren M, *et al*. Distribution of risk factors of hypertension  
34 patients in different age groups in Tianjin. *BMC Public Health* 2021;21:247. dio:  
35 10.1186/s12889-021-10250-9.  
36  
37  
38 25. Shihab HM, Meoni LA, Chu AY, *et al*. Body mass index and risk of incident  
39 hypertension over the life course: The Johns Hopkins precursors study.  
40 *Circulation* 2012;126(25):2983–2989. dio:  
41 10.1161/CIRCULATIONAHA.112.117333.  
42  
43  
44 26. Tohidi M, Hatami M, Hadaegh F, *et al*. Triglycerides and triglycerides to high-  
45 density lipoprotein cholesterol ratio are strong predictors of incident  
46 hypertension in middle eastern women. *J. Hum. Hypertens* 2012;26(9):525–  
47 532. dio: 10.1038/jhh.2011.70.  
48  
49  
50 27. Zhang W, Wang L, Chen Y, *et al*. Identification of hypertension predictors and  
51 application to hypertension prediction in an urban han Chinese population: A  
52 longitudinal study, 2005–2010. *Preventing Chronic Disease* 2015;12:E184. dio:  
53 10.5888/pcd12.150192.  
54  
55  
56  
57  
58  
59  
60

- 1  
2  
3 28. Yang JM, Liu F, Wang B, *et al.* Blood pressure states transition inference based  
4 on multi-state Markov model. *IEEE J Biomed Health* 2021;25(1):237-246. dio:  
5 10.1109/JBHI.2020.3006217.  
6  
7  
8 29. Wang YF, Ma ZM, Xu CN, *et al.* Prediction of transfer among multiple states of  
9 blood pressure based on Markov model: an 18-year cohort study. *J. Hypertens*  
10 2018;36:15061513. dio:10.1097/HJH.0000000000001722.  
11  
12 30. Mills KT, Obst KM, Wei S, *et al.* Comparative effectiveness of implementation  
13 strategies for blood pressure control in hypertensive patients: A systematic  
14 review and meta-analysis. *Ann. Internal Med* 2018;168(2):110–120. dio:  
15 10.7326/M17-1805.  
16  
17 31. Tada T, Kumada T, Toyoda H, *et al.* Longterm natural history of liver disease in  
18 patients with chronic hepatitis b virus infection: An analysis using the Markov  
19 chain model. *J. Gastroenterol* 2018;53(11):1196–1205. dio: 10.1007/s00535-  
20 018-1467-x.  
21  
22 32. Wong LY, Toh MPHS and Tham LWC. Projection of prediabetes and diabetes  
23 population size in singapore using a dynamic Markov model. *J. Diabetes*  
24 2017;9(1):65–75. dio: 10.1111/1753-0407.12384. 10.1111/1753-  
25 0407.12384  
26  
27 33. Grover G, Sabharwal A, Kumar S, *et al.* A multi-state Markov model for the  
28 progression of chronic kidney disease. *Türkiye Klinikleri Biyoistatistik*  
29 2019;11(1):1–14. dio: 10.5336/biostatic.2018-62156.  
30  
31 34. Brookmeyer R and Abdalla N. Multistate models and lifetime risk estimation:  
32 Application to Alzheimer’s disease. *Statist. Med* 2019;38(9):1558–1565. dio:  
33 10.1002/sim.8056.  
34  
35 35. Srikanth P. Using Markov chains to predict the natural progression of diabetic  
36 retinopathy. *Int. J. Ophthalmol* 2015;8(1):383–392. dio:  
37 CNKI:SUN:GYZZ.0.2015-01-026.  
38  
39 36. Attard SM, Herring AH, Zhang B, *et al.* Associations between age, cohort, and  
40 urbanization with SBP and DBP in China: a population based study across 18  
41 years. *J Hypertens* 2015;33:948–956.  
42  
43 37. Guo J, Zhu YC, Chen YP, *et al.* The dynamics of hypertension prevalence,  
44 awareness, treatment, control and associated factors in Chinese adults: results  
45 from CHNS 1991-2011. *J Hypertens* 2015;33:1688–1696.  
46  
47  
48  
49  
50  
51  
52  
53  
54  
55  
56  
57  
58  
59  
60

- 1  
2  
3 38. Cuddy MLS. The Seventh report of the joint national committee on prevention,  
4 detection, evaluation, and treatment of high blood pressure. *Hypertension*  
5 2004;55:17–21.  
6  
7  
8 39. Jackson CH. Multi-state models for panel data: the msm package for R. *J Stat*  
9 *Soft* 2011;38:1–28. dio: 10.18637/jss.v038.i08.  
10  
11 40. China development research foundation, 2020. China development report-  
12 aging population in 2020: Development trend and policy options. Available from  
13 URL: <http://www.199it.com/archives/1068230.html>  
14  
15 41. Singh S, Shankar R, and Singh GP. Prevalence and associated risk factors of  
16 hypertension: A cross-sectional study in urban Varanasi. *Int. J.Hypertens*  
17 2017;2017:5491838. dio: 10.1155/2017/5491838.  
18  
19 42. Faulkner JL and de Chantemèle EJB. Sex differences in mechanisms of  
20 hypertension associated with obesity. *Hypertension* 2018;71(1):15–21. dio:  
21 10.1161/HYPERTENSIONAHA.117.09980.  
22  
23 43. Davis J, Juarez D, and Hodges K. Relationship of ethnicity and body mass index  
24 with the development of hypertension and hyperlipidemia. *Ethnicity Disease*  
25 2013;23(1):65–70. dio: 10.1111/jphd.12008.  
26  
27 44. Huang Z, Wang GD, Jonas JB, *et al*. Blood pressure control and progression of  
28 arteriosclerosis in hypertension. *J. Hypertens* 2021;39(6):1221-1229. dio:  
29 10.1097/HJH.0000000000002758.  
30  
31  
32  
33  
34  
35  
36  
37  
38  
39  
40  
41  
42  
43  
44  
45  
46  
47  
48  
49  
50  
51  
52  
53  
54  
55  
56  
57  
58  
59  
60



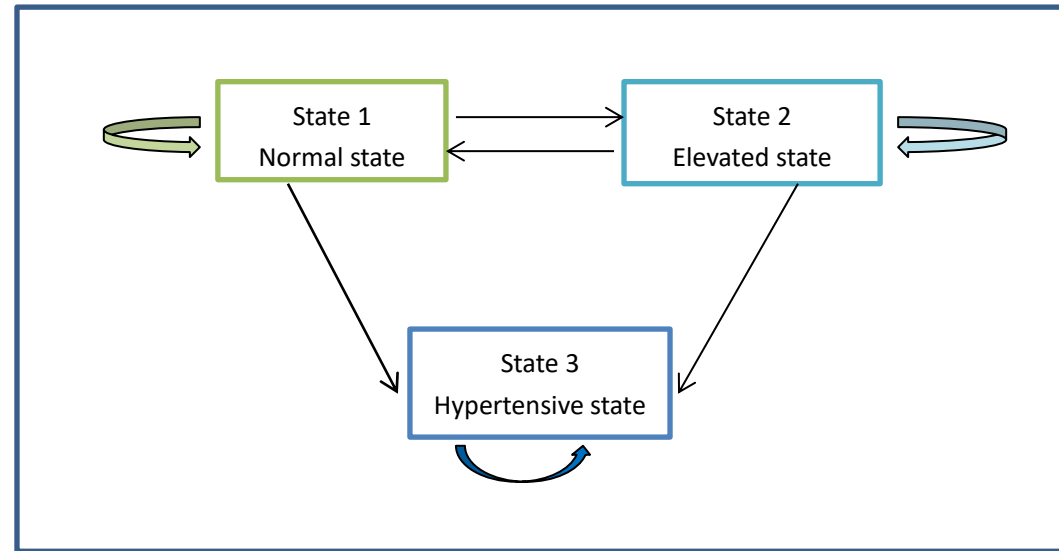

**Figure 1:** Three blood pressure states transitions In the Markov model

1  
2  
3  
4  
5  
6  
7  
8  
9  
10  
11  
12  
13  
14  
15  
16  
17  
18  
19  
20  
21  
22  
23  
24  
25  
26  
27  
28  
29  
30  
31  
32  
33  
34  
35  
36  
37  
38  
39  
40  
41  
42  
43  
44  
45  
46

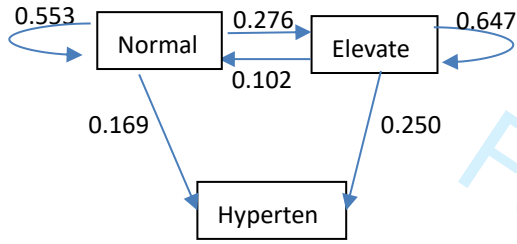

1 year transition diagram

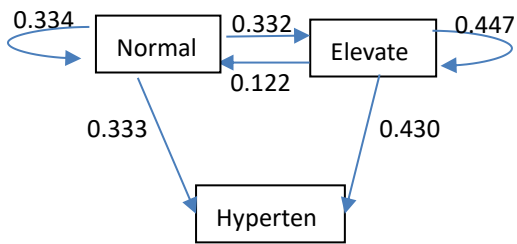

2 year transition diagram

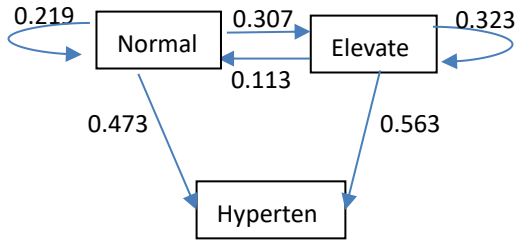

3 year transition diagram

Figure 2: State transition diagrams for female participants

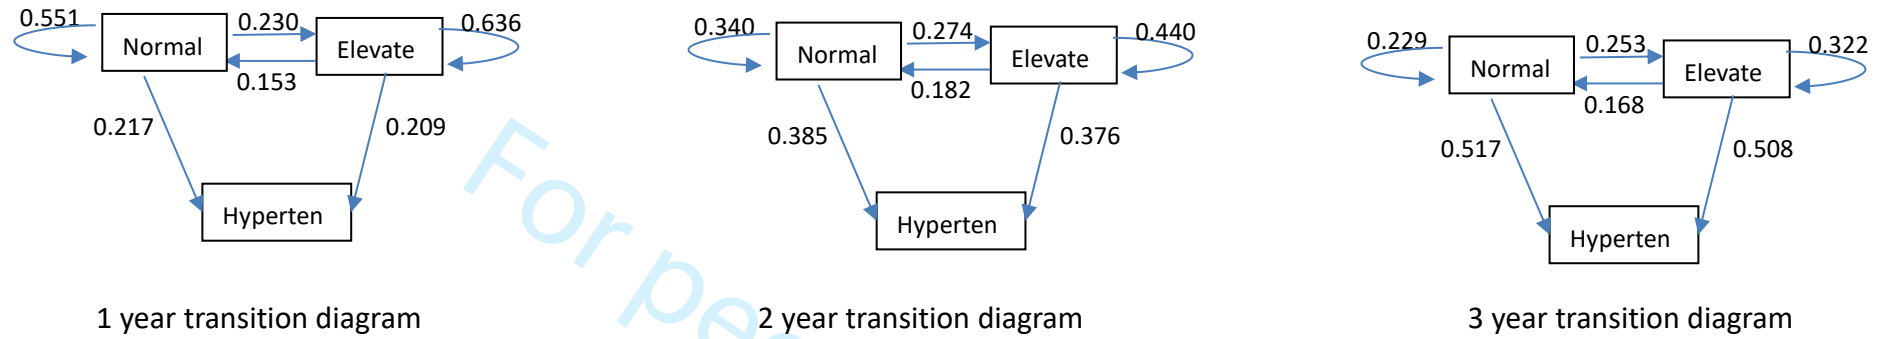

**Figure 3:** State transition diagrams for male participants

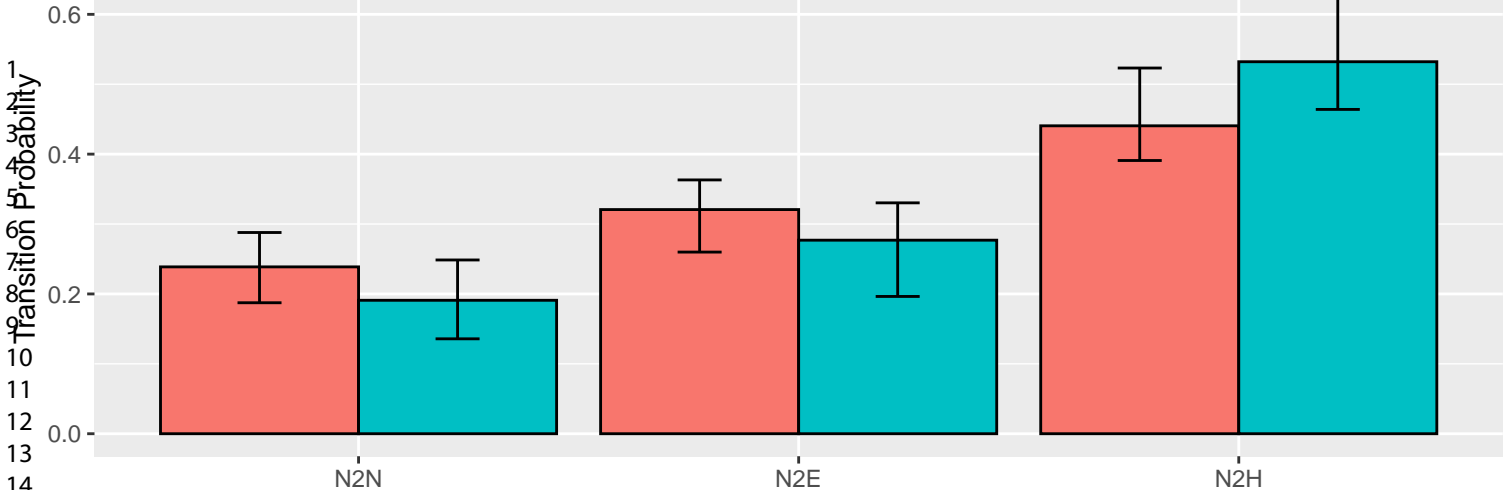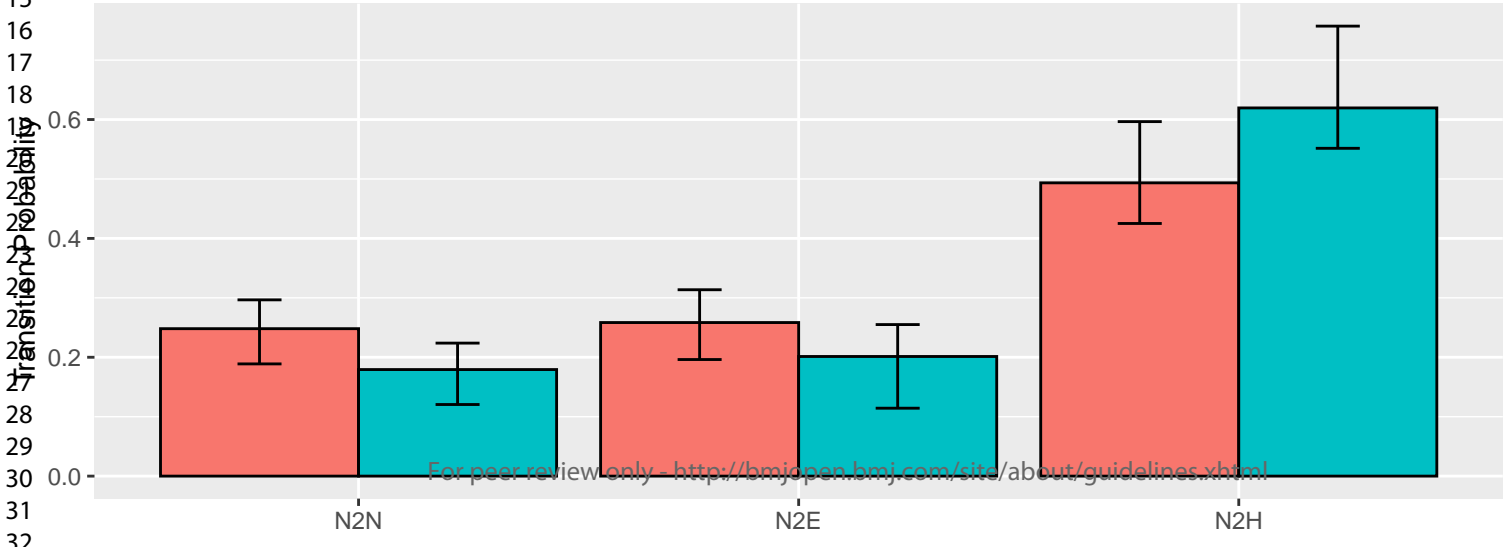

BMJ Open

1  
2  
3  
4  
5  
6  
7  
8  
9  
10  
11  
12  
13  
14  
15  
16  
17  
18  
19  
20  
21  
22  
23  
24  
25  
26  
27  
28  
29  
30  
31  
32

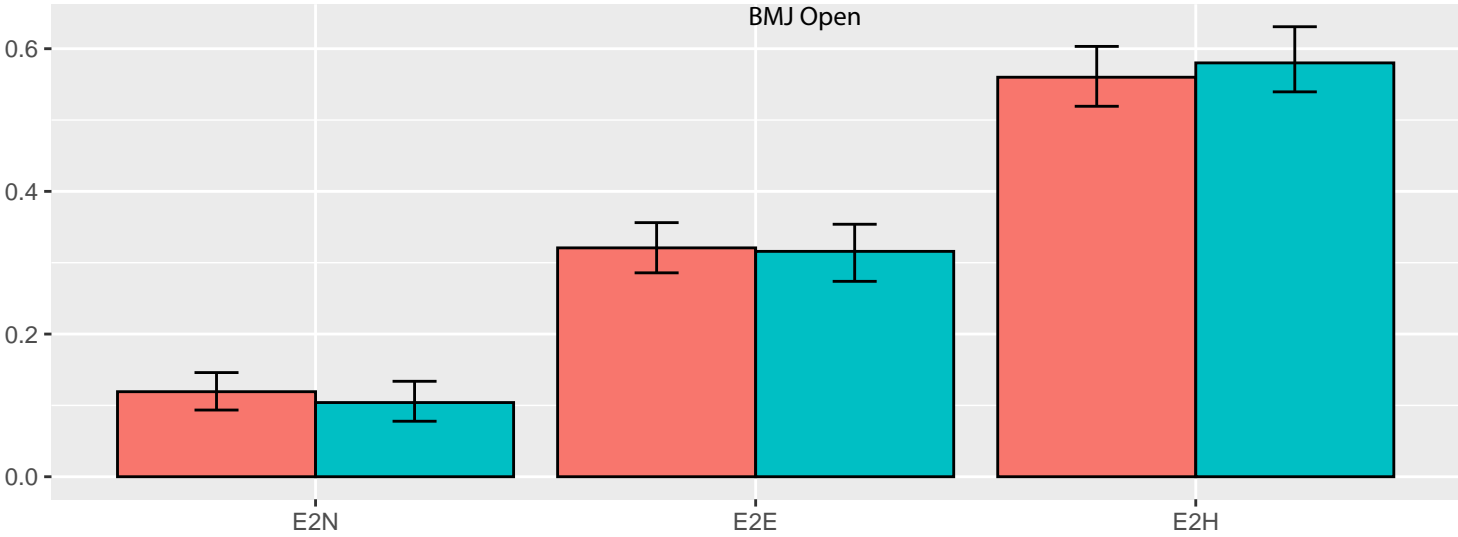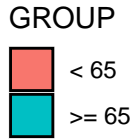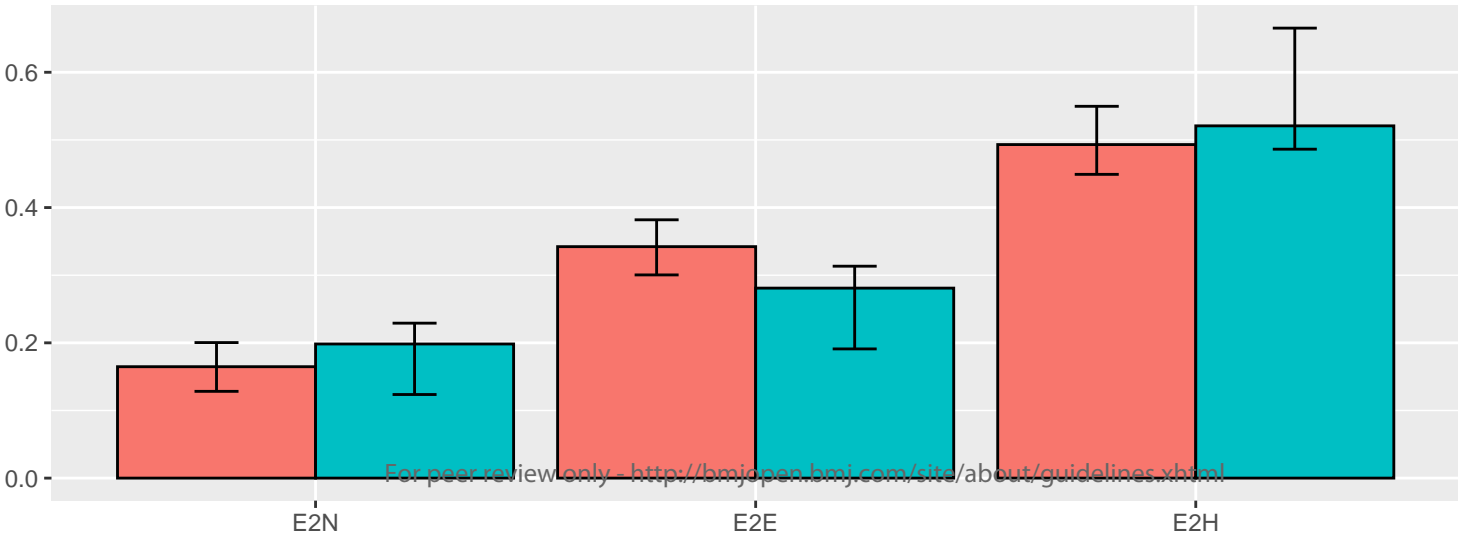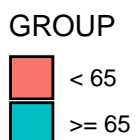

1  
2  
3  
4  
5  
6  
7  
8  
9  
10  
11  
12  
13  
14  
15  
16  
17  
18  
19  
20  
21  
22  
23  
24  
25  
26  
27  
28  
29  
30  
31  
32  
33  
34  
35  
36  
37  
38  
39  
40  
41  
42  
43  
44  
45  
46  
47  
48  
49  
50  
51  
52  
53  
54  
55  
56  
57  
58  
59  
60

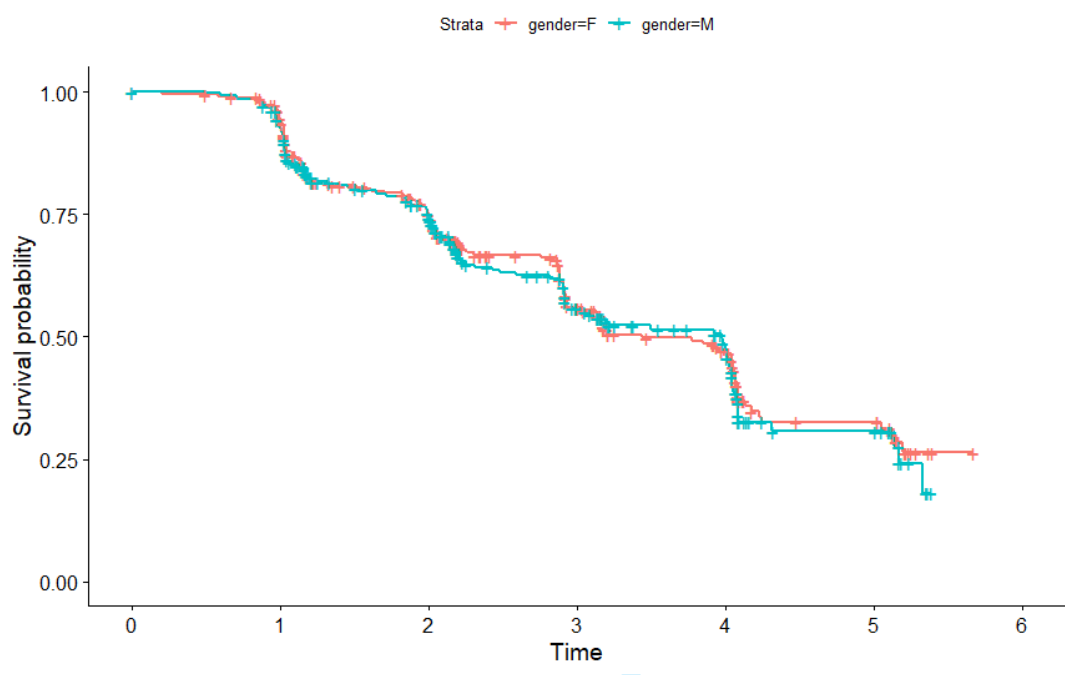

Figure 6: Survival distribution starting from normal state



**Figure 7:** Survival distribution starting from the elevated state

Table S1: The six possible blood pressure state transitions with the corresponding probabilities in the 3rd year, stratified by gender and age group

| Gender | Group | States transition | Transition probability  |
|--------|-------|-------------------|-------------------------|
| Female | <65   | N2N               | 0.2387 (0.1874, 0.2879) |
| Female | >=65  | N2N               | 0.1909 (0.1358, 0.2486) |
| Male   | <65   | N2N               | 0.2481 (0.1888, 0.2966) |
| Male   | >=65  | N2N               | 0.1793 (0.1205, 0.2238) |
| Female | <65   | N2E               | 0.3207 (0.2599, 0.3631) |
| Female | >=65  | N2E               | 0.2769 (0.1964, 0.3303) |
| Male   | <65   | N2E               | 0.2584 (0.1962, 0.3136) |
| Male   | >=65  | N2E               | 0.2013 (0.1143, 0.2550) |
| Female | <65   | N2H               | 0.4405 (0.3909, 0.5232) |
| Female | >=65  | N2H               | 0.5322 (0.4640, 0.6438) |
| Male   | <65   | N2H               | 0.4935 (0.4251, 0.5965) |
| Male   | >=65  | N2H               | 0.6195 (0.5516, 0.7572) |
| Female | <65   | E2N               | 0.1192 (0.0935, 0.1460) |
| Female | >=65  | E2N               | 0.1040 (0.0778, 0.1338) |
| Male   | <65   | E2N               | 0.1647 (0.1283, 0.2004) |
| Male   | >=65  | E2N               | 0.1983 (0.1236, 0.2291) |
| Female | <65   | E2E               | 0.3208 (0.2858, 0.3562) |
| Female | >=65  | E2E               | 0.3159 (0.2739, 0.3539) |
| Male   | <65   | E2E               | 0.3422 (0.3004, 0.3819) |
| Male   | >=65  | E2E               | 0.2809 (0.1910, 0.3133) |
| Female | <65   | E2H               | 0.5600 (0.5193, 0.6032) |
| Female | >=65  | E2H               | 0.5801 (0.5395, 0.6308) |
| Male   | <65   | E2H               | 0.4931 (0.4491, 0.5497) |
| Male   | >=65  | E2H               | 0.5208 (0.4863, 0.6653) |

N2N: normal state to normal state; N2E: normal state to elevated state; N2H: normal state to hypertensive state; E2N: normal state to normal state; E2E: elevated state to elevated state; E2H: elevated state to hypertensive state;



STROBE Statement—Checklist of items that should be included in reports of *cohort studies*

|                              | Item No | Recommendation                                                                                                                                                                                                                                                                                                         | Page No |
|------------------------------|---------|------------------------------------------------------------------------------------------------------------------------------------------------------------------------------------------------------------------------------------------------------------------------------------------------------------------------|---------|
| <b>Title and abstract</b>    | 1       | (a) Indicate the study's design with a commonly used term in the title or the abstract<br>(b) Provide in the abstract an informative and balanced summary of what was done and what was found                                                                                                                          | 1       |
| <b>Introduction</b>          |         |                                                                                                                                                                                                                                                                                                                        |         |
| Background/rationale         | 2       | Explain the scientific background and rationale for the investigation being reported                                                                                                                                                                                                                                   | 2-3     |
| Objectives                   | 3       | State specific objectives, including any prespecified hypotheses                                                                                                                                                                                                                                                       | 4       |
| <b>Methods</b>               |         |                                                                                                                                                                                                                                                                                                                        |         |
| Study design                 | 4       | Present key elements of study design early in the paper                                                                                                                                                                                                                                                                | 4       |
| Setting                      | 5       | Describe the setting, locations, and relevant dates, including periods of recruitment, exposure, follow-up, and data collection                                                                                                                                                                                        | 4       |
| Participants                 | 6       | (a) Give the eligibility criteria, and the sources and methods of selection of participants. Describe methods of follow-up<br>(b) For matched studies, give matching criteria and number of exposed and unexposed                                                                                                      | 4       |
| Variables                    | 7       | Clearly define all outcomes, exposures, predictors, potential confounders, and effect modifiers. Give diagnostic criteria, if applicable                                                                                                                                                                               | 5       |
| Data sources/<br>measurement | 8*      | For each variable of interest, give sources of data and details of methods of assessment (measurement). Describe comparability of assessment methods if there is more than one group                                                                                                                                   | 5       |
| Bias                         | 9       | Describe any efforts to address potential sources of bias                                                                                                                                                                                                                                                              | 4-5     |
| Study size                   | 10      | Explain how the study size was arrived at                                                                                                                                                                                                                                                                              | 4       |
| Quantitative variables       | 11      | Explain how quantitative variables were handled in the analyses. If applicable, describe which groupings were chosen and why                                                                                                                                                                                           | 5       |
| Statistical methods          | 12      | (a) Describe all statistical methods, including those used to control for confounding<br>(b) Describe any methods used to examine subgroups and interactions<br>(c) Explain how missing data were addressed<br>(d) If applicable, explain how loss to follow-up was addressed<br>(e) Describe any sensitivity analyses | 5       |
| <b>Results</b>               |         |                                                                                                                                                                                                                                                                                                                        |         |
| Participants                 | 13*     | (a) Report numbers of individuals at each stage of study—eg numbers potentially eligible, examined for eligibility, confirmed eligible, included in the study, completing follow-up, and analysed<br>(b) Give reasons for non-participation at each stage<br>(c) Consider use of a flow diagram                        | 6       |
| Descriptive data             | 14*     | (a) Give characteristics of study participants (eg demographic, clinical, social) and information on exposures and potential confounders<br>(b) Indicate number of participants with missing data for each variable of interest<br>(c) Summarise follow-up time (eg, average and total amount)                         | 6       |
| Outcome data                 | 15*     | Report numbers of outcome events or summary measures over time                                                                                                                                                                                                                                                         | 7       |

|    |                          |    |                                                                                                                                                                                                              |      |
|----|--------------------------|----|--------------------------------------------------------------------------------------------------------------------------------------------------------------------------------------------------------------|------|
| 1  | Main results             | 16 | (a) Give unadjusted estimates and, if applicable, confounder-adjusted estimates and their precision (eg, 95% confidence interval). Make clear which confounders were adjusted for and why they were included | 7-9  |
| 2  |                          |    | (b) Report category boundaries when continuous variables were categorized                                                                                                                                    |      |
| 3  |                          |    | (c) If relevant, consider translating estimates of relative risk into absolute risk for a meaningful time period                                                                                             |      |
| 4  | Other analyses           | 17 | Report other analyses done—eg analyses of subgroups and interactions, and sensitivity analyses                                                                                                               | 8    |
| 5  | <b>Discussion</b>        |    |                                                                                                                                                                                                              |      |
| 6  | Key results              | 18 | Summarise key results with reference to study objectives                                                                                                                                                     | 9-10 |
| 7  | Limitations              | 19 | Discuss limitations of the study, taking into account sources of potential bias or imprecision. Discuss both direction and magnitude of any potential bias                                                   | 11   |
| 8  | Interpretation           | 20 | Give a cautious overall interpretation of results considering objectives, limitations, multiplicity of analyses, results from similar studies, and other relevant evidence                                   | 11   |
| 9  | Generalisability         | 21 | Discuss the generalisability (external validity) of the study results                                                                                                                                        | 11   |
| 10 | <b>Other information</b> |    |                                                                                                                                                                                                              |      |
| 11 | Funding                  | 22 | Give the source of funding and the role of the funders for the present study and, if applicable, for the original study on which the present article is based                                                | 12   |

\*Give information separately for exposed and unexposed groups.

**Note:** An Explanation and Elaboration article discusses each checklist item and gives methodological background and published examples of transparent reporting. The STROBE checklist is best used in conjunction with this article (freely available on the Web sites of PLoS Medicine at <http://www.plosmedicine.org/>, Annals of Internal Medicine at <http://www.annals.org/>, and Epidemiology at <http://www.epidem.com/>). Information on the STROBE Initiative is available at <http://www.strobe-statement.org>.
